# Supplementary material
Source: PubMed Central journal article supplement (PMC6225990)
Supplement: NIHMS79101-supplement-Supplementary_information.pdf [file NIHMS79101-supplement-Supplementary_information.pdf]

## Supplementary Information

### Safety and antiviral activity of combination HIV-1 broadly neutralizing antibodies in viremic individuals

#### Supplementary Figures

- Supplementary Figure 1 Subject enrollment and study design
- Supplementary Figure 2 CD4<sup>+</sup> T cell counts
- Supplementary Figure 3 BNAb half-lives in HIV-1-infected individuals
- Supplementary Figure 4 HIV-1 RNA and bNAb levels in all study participants
- Supplementary Figure 5 Viral suppression in combination therapy vs. monotherapy
- Supplementary Figure 6 Viral sequence analysis
- Supplementary Figure 7 HIV-1 *env* sequence logo plots
- Supplementary Figure 8 In-depth analysis of 3BNC117 and 10-1074 binding site mutations in participants 91C35 and 9341
- Supplementary Figure 9 Pseudovirus sensitivities of participant 91C34

#### Supplementary Tables

- Supplementary Table 1 BNAb sensitivities of bulk culture-derived viruses from viremic individuals
- Supplementary Table 2 Individual participant baseline demographics
- Supplementary Table 3 HIV-1 RNA levels, CD4<sup>+</sup> T cell counts and bNAb serum levels
- Supplementary Table 4 Adverse events reported during study follow-up
- Supplementary Table 5 Pharmacokinetics of 3BNC117 and 10-1074
- Supplementary Table 6 Antibody sensitivity of plasma SGA-derived pseudoviruses

## Individuals on ART

## Viremic individuals

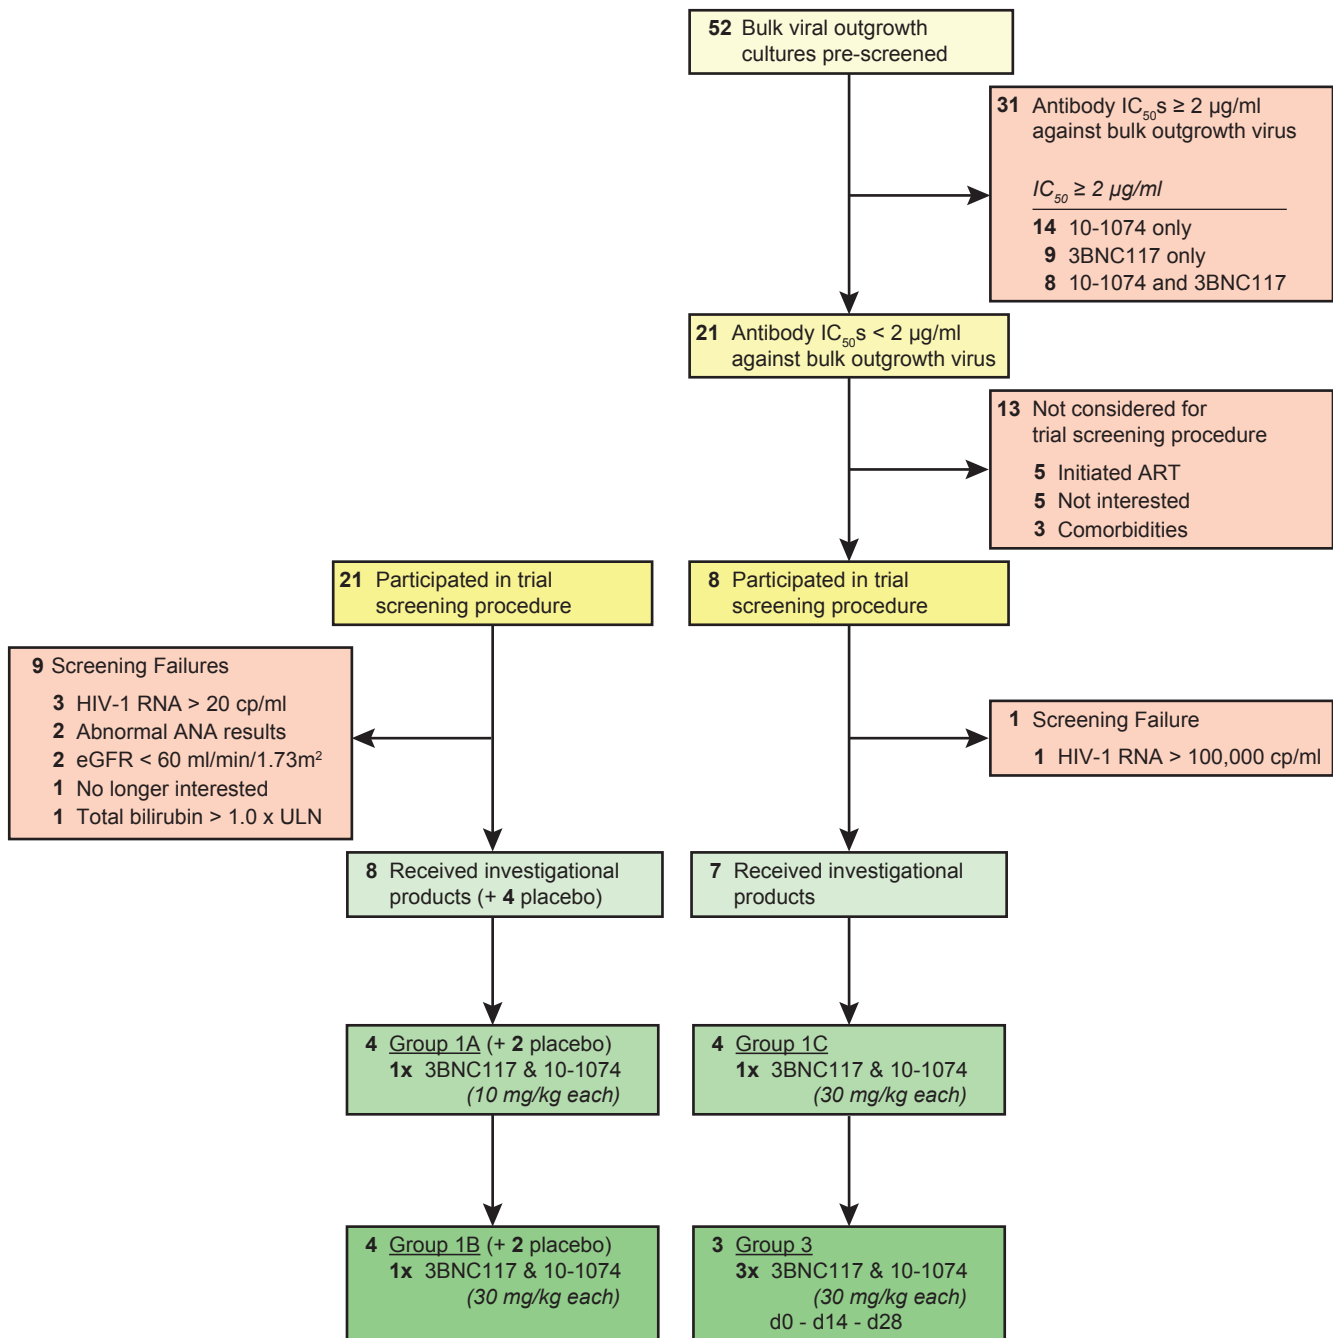

**Supplementary Figure 1.** Subject enrollment and study design

HIV-1-infected individuals on antiretroviral therapy were screened for enrollment into group 1A (single infusion of 3BNC117 + 10-1074 (10 mg/kg each)) and group 1B (single infusion of 3BNC117 + 10-1074 (30 mg/kg each)). Enrollment into groups 1A and 1B was double-blind and individuals were randomized to receive the antibodies or placebo at a 2:1 ratio (total  $n=6$  per group). Placebo recipients are not included in the data analysis. Viremic individuals off antiretroviral therapy were invited for participation if virus obtained by bulk CD4<sup>+</sup> T cell outgrowth culture was determined to be sensitive against both 3BNC117 and 10-1074 ( $IC_{50} < 2 \mu\text{g/ml}$  for each antibody in TZM-bl assay). Enrolled viremic individuals received a single infusion of 30 mg/kg of each antibody (group 1C) or three infusions of 30 mg/kg of each antibody every two weeks (d0, d14, d28).

**a**

Viremic

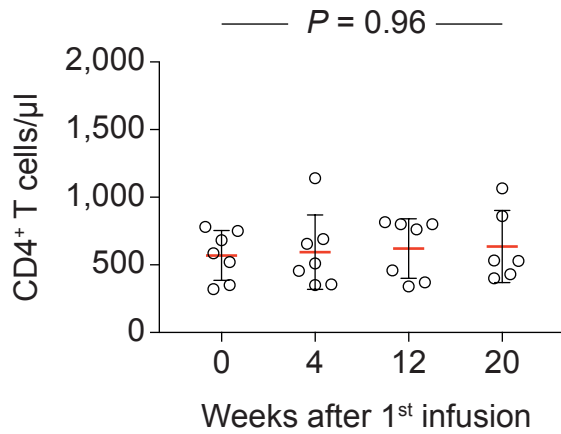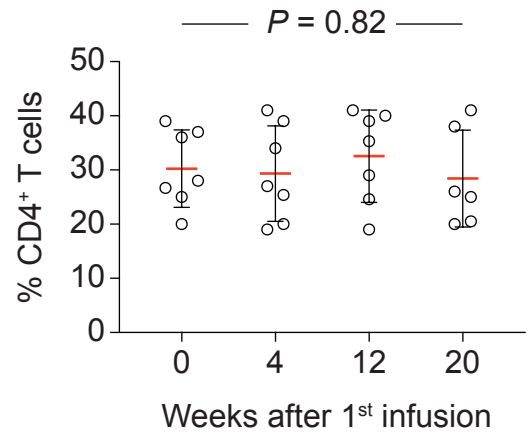

**b**

On ART

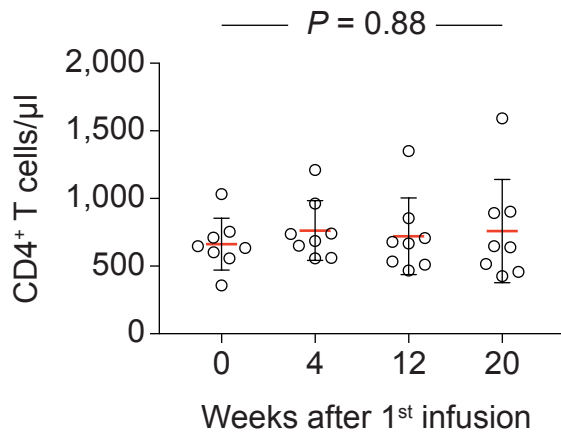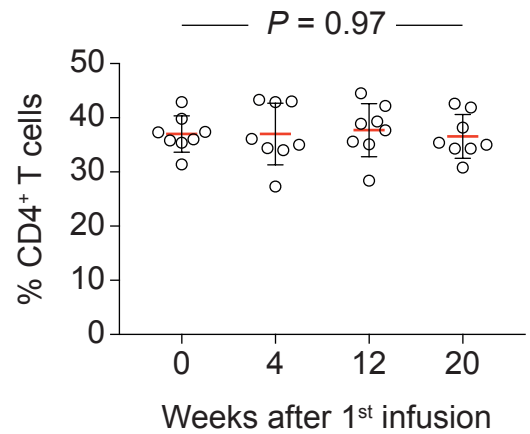

**Supplementary Figure 2. CD4<sup>+</sup> T cell counts**

Absolute CD4<sup>+</sup> T cell counts (left) and relative CD4<sup>+</sup> T cell frequency among CD3<sup>+</sup> lymphocytes (right) in (a) viremic individuals ( $n=7$ ) and (b) individuals on antiretroviral therapy ( $n=8$ ). Red lines indicate arithmetic mean and error bars indicate standard deviation.  $P$  values were calculated using one-way ANOVA comparing all groups.

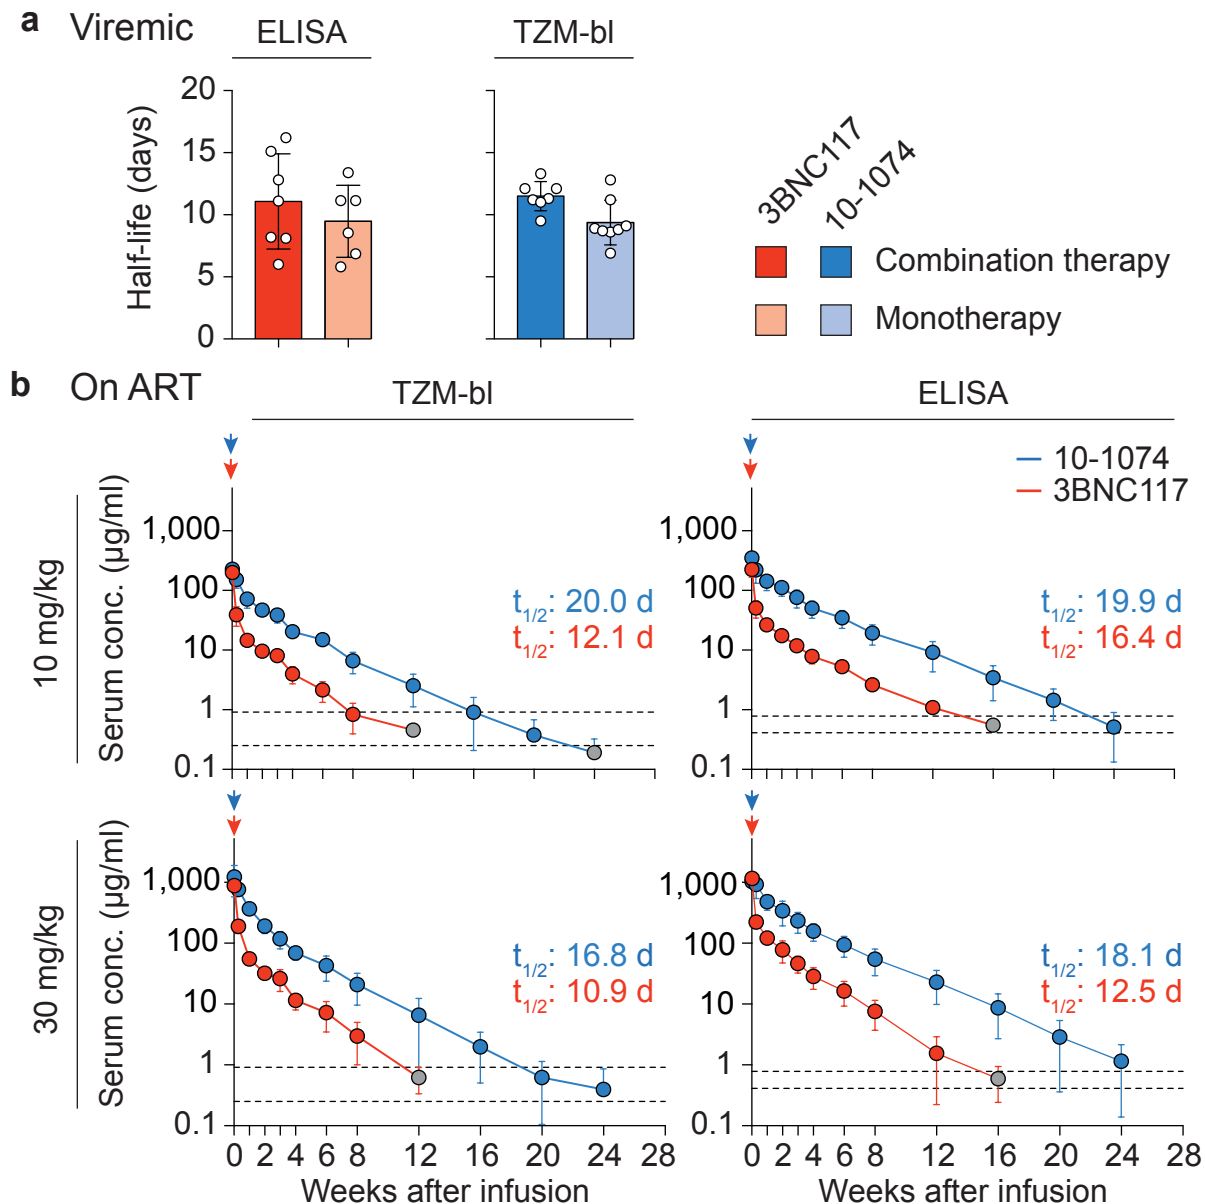

**Supplementary Figure 3. BNAbs half-lives in HIV-1-infected individuals**

(a) Terminal bNAb half-lives based on serum concentrations determined by ELISA or TZM-bl assay in viremic study participants receiving a single or three infusions of 30 mg/kg of each 3BNC117 and 10-1074 (combination) ( $n = 7$ ), and viremic individuals receiving a single infusion of 3BNC117 or 10-1074 alone (monotherapy) at a dose of 30 mg/kg ( $n = 6$  for 3BNC117 and  $n = 8$  for 10-1074) (3BNC117, Caskey and Klein *et al.*, *Nature* **522**, 487-491 (2015); 10-1074, Caskey, Schoofs and Gruell *et al.*, *Nat. Med.* **23**, 185-191 (2017)). Columns indicate arithmetic means and bars indicate standard deviation. Circles indicate individual participants. Note that different pseudovirus strains were used to determine antibody concentrations (3103.v3.C10 and X2088\_c9 for mono- and combination therapy, respectively). (b) Serum concentrations of 3BNC117 (red) and 10-1074 (blue) after a single infusion of 10 mg/kg (top,  $n = 4$ ) or 30 mg/kg (bottom,  $n = 4$ ) of each antibody to individuals on continuous ART as determined by TZM-bl (left) or ELISA (right). For the TZM-bl assay, time points with detectable activity against MuLV ( $\text{ID}_{80} > 20$ ) were excluded. In cases of detectable baseline levels by ELISA, these were subtracted, and only measurements above 3-fold baseline levels are included. Circles and lines indicate arithmetic mean and standard deviation, respectively. Dashed lines indicate detection limits for 3BNC117 (top) and 10-1074 (bottom). Grey circles indicate levels below the limit of detection. Arrows indicate antibody infusions.

**a** On ART

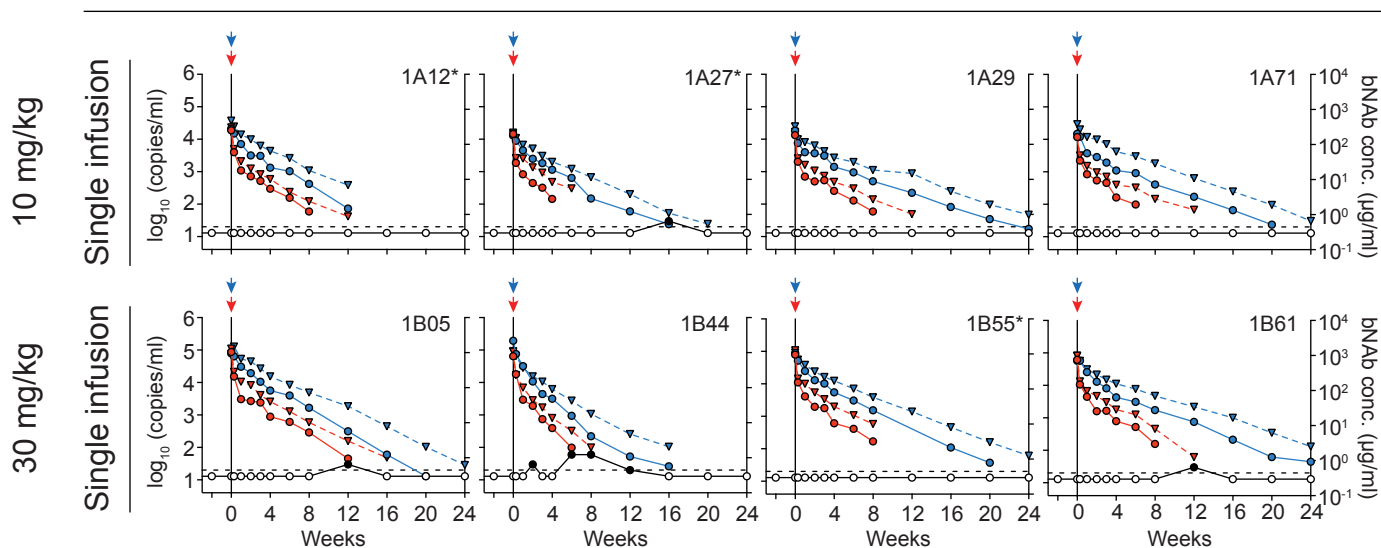

**b** Viremic

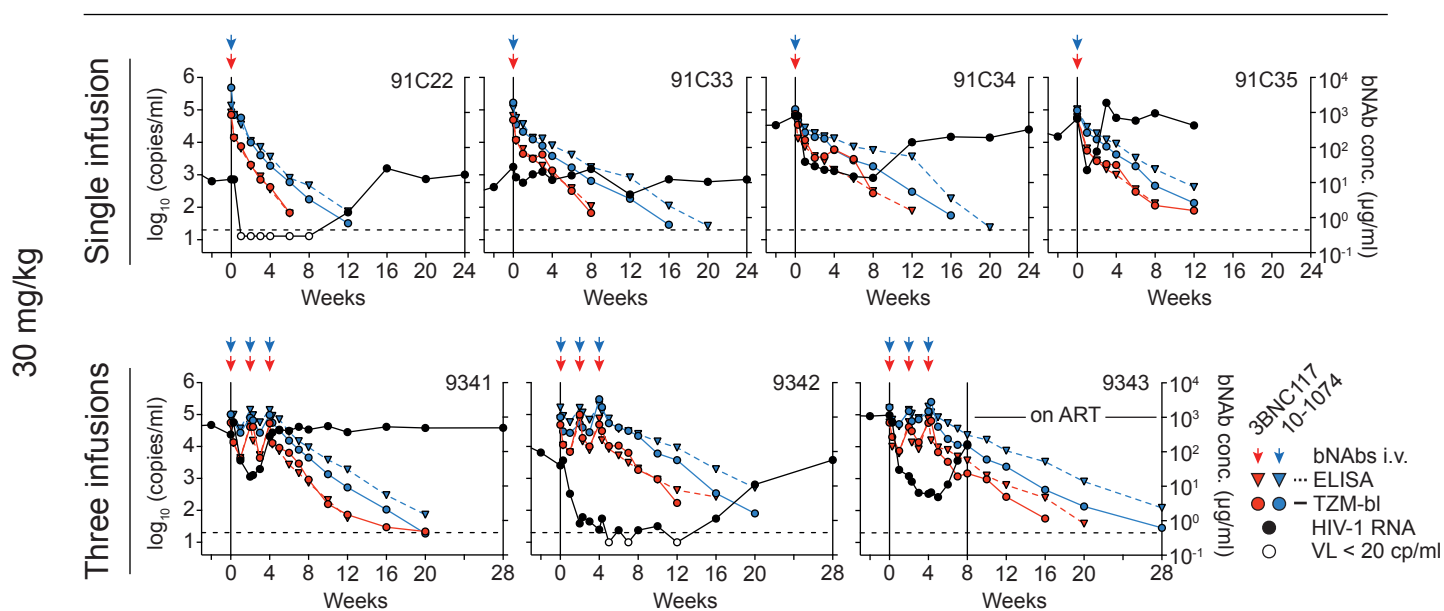

**Supplementary Figure 4. HIV-1 RNA and bNAb antibody levels in all study participants**

Graphs illustrate viral load (black line; left y-axis) and bNAb serum levels (red, 3BNC117; blue, 10-1074; right y-axis) over time in (a) individuals on antiretroviral therapy (top, single infusion of 10 mg/kg of each antibody; bottom, single infusion of 30 mg/kg of each antibody) and (b) viremic participants (top, single infusion of 30 mg/kg of each antibody; bottom, three infusions of 30 mg/kg of each antibody every two weeks). Only bNAb levels above the respective limit of detection are shown. Antibody levels determined by TZM-bl assay are indicated by colored solid line and circles, and TZM-bl results were excluded if activity against negative control virus (MuLV) was observed. Antibody levels determined by ELISA are indicated by colored dashed line and triangles. Asterisks (\*) indicate individuals with detectable baseline levels in ELISA. In these cases, baseline levels were subtracted from subsequent bNAb concentrations determined by ELISA (3BNC117, 1A27 (1.17 µg/ml) and 1B55 (2.48 µg/ml); 10-1074, 1A12 (0.43 µg/ml)) and curves only show concentrations that are 3-fold higher than baseline levels. Dashed black line indicates limit of detection for HIV-1 RNA (20 copies/ml). Arrows indicate antibody infusions.

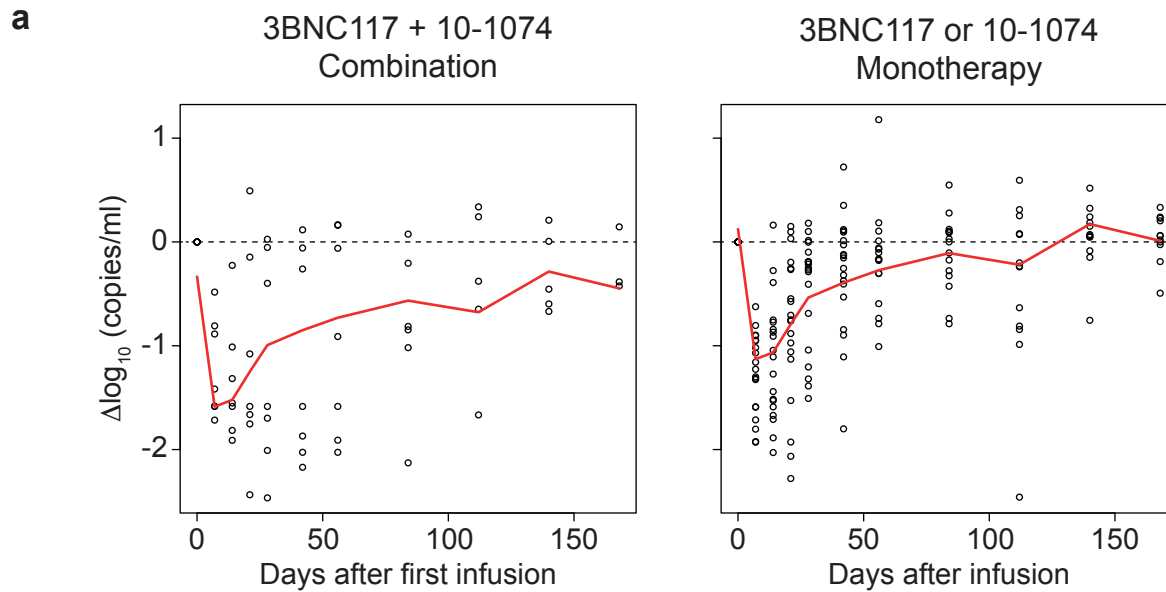

**b**

| Correlation      | With Treatment | Without Treatment |
|------------------|----------------|-------------------|
| none             | 410.1444777    | 413.2992212       |
| corARMA(p=0,q=1) | 342.3434909    | 345.3257615       |
| corARMA(p=0,q=2) | 334.8421682    | 337.8340493       |
| corARMA(p=1,q=0) | 326.0505608    | 327.9541902       |
| corARMA(p=1,q=1) | 327.2169635    | 329.4295783       |
| corARMA(p=1,q=2) | 329.2051113    | 331.4291768       |
| corARMA(p=2,q=0) | 327.1790532    | 329.4238417       |
| corARMA(p=2,q=1) | 328.5336267    | 330.5019875       |
| corARMA(p=2,q=2) | 330.4939601    | 332.5006249       |
| corExp           | 326.0505609    | 327.9541903       |
| corLin           | 335.9980408    | 342.6470672       |
| corRatio         | 328.314909     | 331.1412435       |
| corSpher         | 326.8269772    | 329.4149949       |
| corGaus          | 337.8828039    | 340.8426585       |
| corSymm          | 296.1530987    | 308.2251827       |

**Supplementary Figure 5. Viral suppression in combination therapy vs. monotherapy**

(a) Marginal means (least-squares means) for the fit linear mixed effects model of individuals receiving 3BNC117 + 10-1074 combination therapy (single infusion or three infusions every two weeks, 30 mg/kg each per infusion) (left) or 3BNC117 or 10-1074 monotherapy (single infusion, 30 mg/kg). Red line indicates marginal means and circles indicate viral loads. Monotherapy data are derived from previously published results in antibody-sensitive viremic individuals (3BNC117, Caskey and Klein *et al.*, *Nature* **522**, 487-491 (2015); 10-1074, Caskey, Schoofs and Gruell *et al.*, *Nat. Med.* **23**, 185-191 (2017)). Only measurements off ART are included (combination,  $n=7$  up to d56,  $n=6$  on d84,  $n=5$  for later time points; monotherapy,  $n=19$  up to d42,  $n=16$  on d56,  $n=15$  on d84,  $n=13$  on d102 and d140,  $n=12$  on d168). (b) Selection of linear mixed effects model to compare 3BNC117 + 10-1074 combination therapy and 3BNC117 or 10-1074 monotherapy (see (a)). Table shows model performances measured as Akaike information criterion for the different linear mixed effects models with time point as fixed effect. Column 'with treatment' has treatment (categories "3BNC117 + 10-1074 combination therapy" and "3BNC117 or 10-1074 monotherapy") as additional fixed effect. Correlation between time points of a participant was modeled based on the order of measurements with the models shown in the column 'correlation'. Based on the linear mixed effects model analysis using the corSymm class of the R package nlme (version 3.1-131), we observed a significant difference between 3BNC117 + 10-1074 combination therapy and 3BNC117 or 10-1074 monotherapy ( $P=0.00018$ ).

91C22

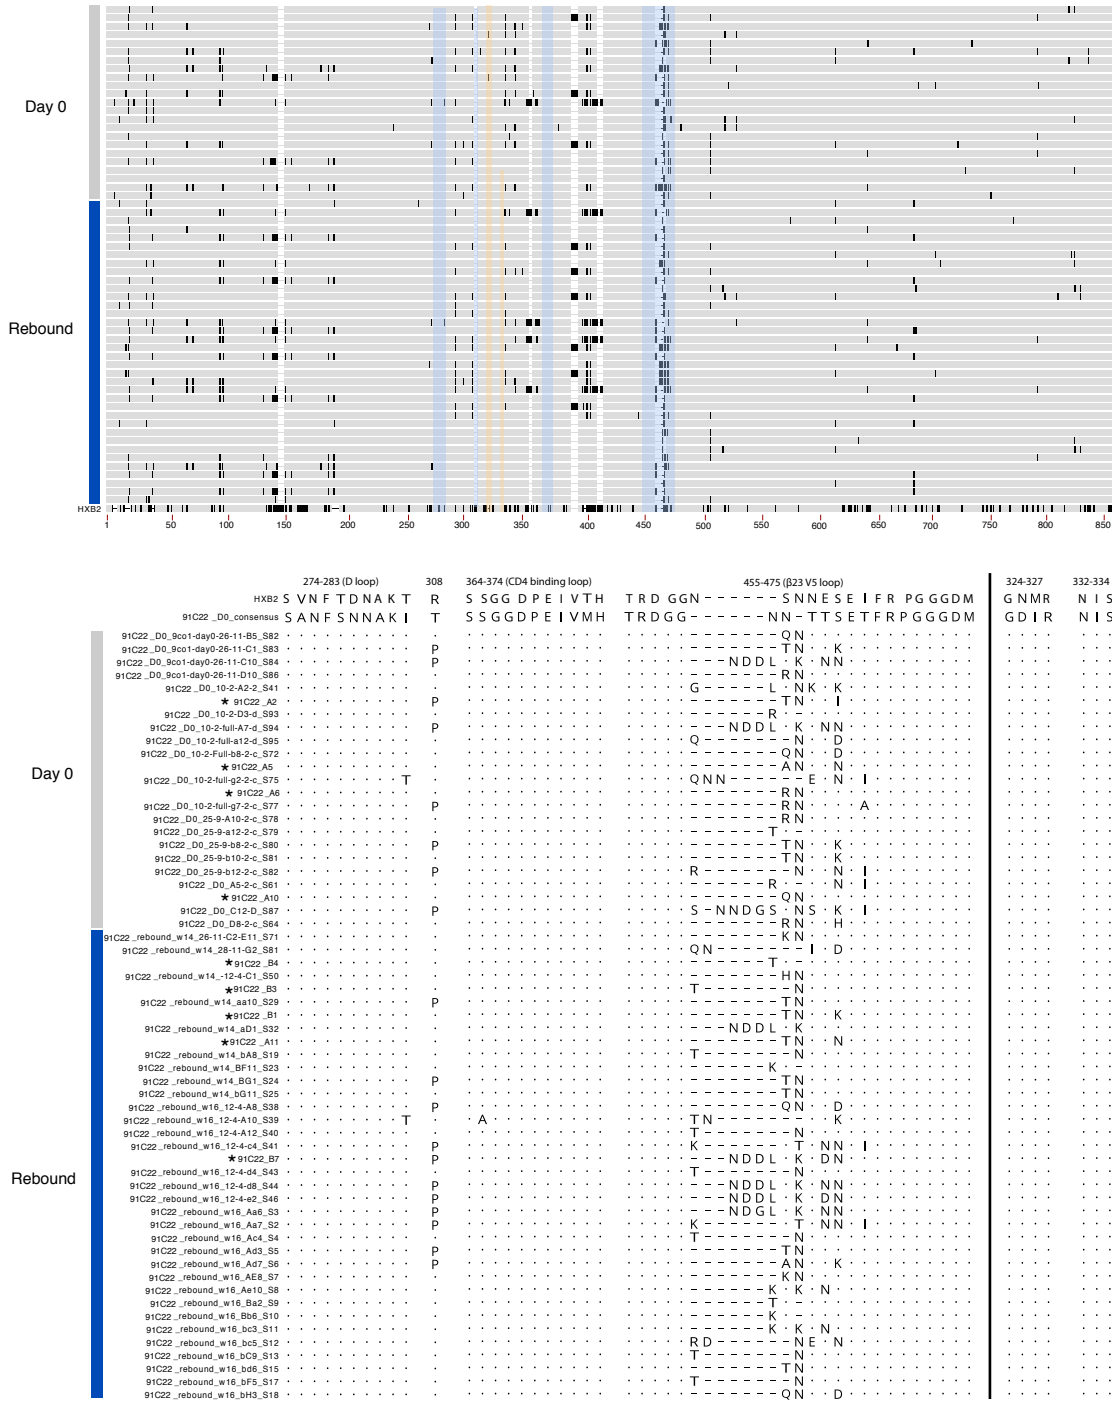

**Supplementary Figure S6. Viral sequence analysis.**

Multiple sequence alignment of Env amino acids obtained by SGA from plasma samples at day 0 and during viral rebound. Tick marks denote differences from day 0 consensus sequence. Blue shading depicts 3BNC117 binding sites and orange shading depicts 10-1074 binding sites. Sequences are numbered relative to HXB2. The bottom panel depicts the shaded areas in the upper panel. Dots depicts residues which are identical to the day 0 consensus sequence. Asterisks represents sequences that were used to generate pseudoviruses.

Supplementary Figure S6. Viral sequence analysis (continued)

91C35

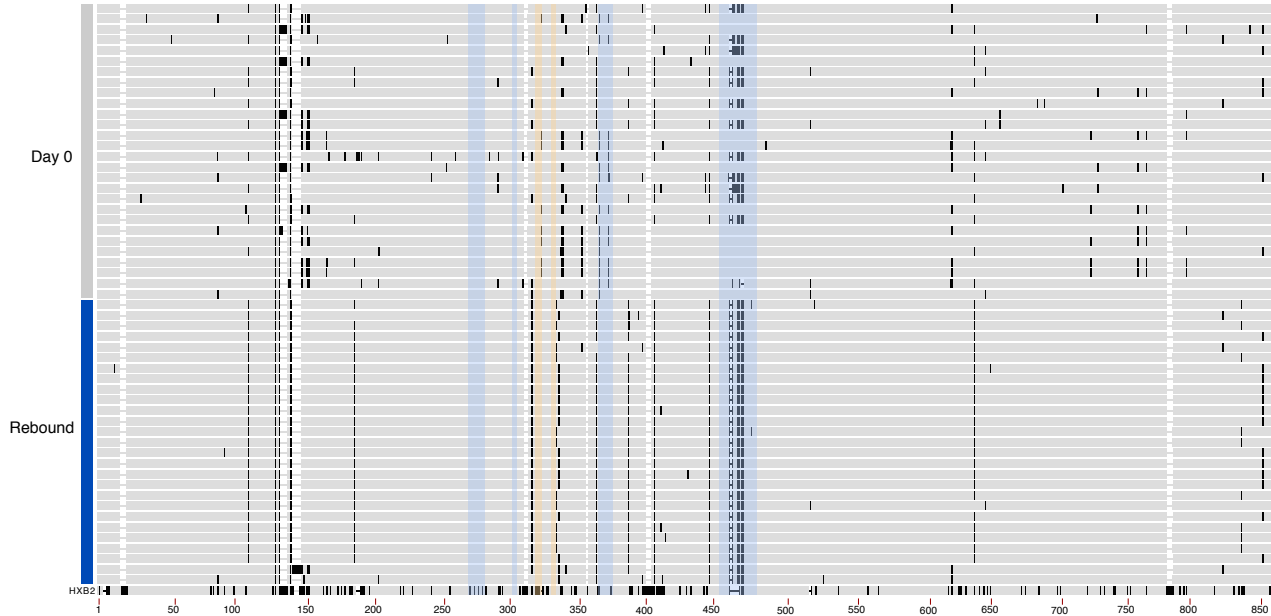

|                                       | 274-283 (D loop)      | 308                   | 364-374 (CD4 binding loop)                            | 455-475 (B23 V5 loop) | 324-327 | 332-334 |
|---------------------------------------|-----------------------|-----------------------|-------------------------------------------------------|-----------------------|---------|---------|
| HXB2                                  | S V N F T D N A K T R | S S G G D P E I V T H | T R D G G N S - - - - N N E S E I F R P G G G D M     | G N M R               | N I S   |         |
| 91C35_D0_consensus                    | S A N F S D N T K T T | H S G G D P E I V M H | T R D G G N A N T T E D G S N K N E T F R P G G G D M | G D I R               | N I S   |         |
| 91C35_D0_3HG-010517-D6_S46            |                       |                       |                                                       |                       |         |         |
| 91C35_D0_3HG-010517-D11_S47           |                       | S                     | V                                                     |                       |         |         |
| 91C35_D0_3HG-011317-C2_S29            |                       |                       |                                                       |                       |         |         |
| 91C35_D0_3HG-011317-C7_S31            |                       | S                     | V                                                     |                       |         |         |
| 91C35_D0_3HG-011317-D9_S32            |                       | S                     |                                                       |                       |         |         |
| 91C35_D0_3HG-011317-D10_S33           |                       |                       |                                                       |                       |         |         |
| ★ 91C35_A1                            |                       |                       |                                                       | S - S                 | S D     | N T     |
| ★ 91C35_A2                            |                       |                       |                                                       | S - S                 | S D     | N T     |
| ★ 91C35_A3                            |                       |                       |                                                       |                       |         |         |
| 91C35_D0_3HG-031317P3-B9_S15          |                       |                       |                                                       | S - S                 | S D     | N T     |
| 91C35_D0_3HG-031317P3-D2_S16          |                       |                       |                                                       |                       |         |         |
| ★ 91C35_A4                            |                       |                       |                                                       | S - S                 | S D     | N T     |
| ★ 91C35_A5                            |                       | P                     | V                                                     |                       |         |         |
| 91C35_D0_3HG-031417P3-A10_S34         |                       | P                     | V                                                     |                       |         |         |
| ★ 91C35_A7                            |                       |                       |                                                       | S - S                 | S D     | N T     |
| 91C35_D0_3HG-031417P3-F7_S40          |                       | S                     | V                                                     |                       |         |         |
| ★ 91C35_A10                           |                       | S                     | V                                                     |                       |         |         |
| 91C35_D0_3HG-031417P3-F11_S42         |                       |                       | E                                                     |                       |         |         |
| 91C35_D0_3HG-031417P3-G11_S43         |                       |                       |                                                       | S - S                 | S D     | N T     |
| 91C35_D0_3HG-031417P3-H1_S44          |                       | P                     | V                                                     |                       |         |         |
| ★ 91C35_A12                           |                       |                       |                                                       | S - S                 | S D     | N T     |
| 91C35_D0_3HG-031617P1-F8_S63          |                       | P                     | V                                                     |                       |         |         |
| 91C35_D0_3HG-031617P2-A3_S64          |                       | P                     | V                                                     |                       |         |         |
| 91C35_D0_3HG-031617P2-C3_S65          |                       | P                     | M                                                     |                       |         |         |
| ★ 91C35_B1                            |                       | P                     | V                                                     |                       |         |         |
| 91C35_D0_3HG-031617P2-D10_S67         |                       | P                     | V                                                     |                       |         |         |
| 91C35_D0_3HG-031617P2-E9_S68          |                       | P                     | V                                                     |                       |         |         |
| 91C35_D0_112216-A5_S26                |                       | P                     | V                                                     |                       | S       | R       |
| ★ 91C35_B6                            |                       |                       |                                                       |                       |         |         |
| 91C35_rebound_W3-3HG-012317-A8_S47    |                       |                       |                                                       |                       |         |         |
| 91C35_rebound_W3-3HG-012317-B1_S49    |                       |                       |                                                       |                       |         |         |
| 91C35_rebound_W3-3HG-012317-B8_S50    |                       |                       |                                                       |                       |         |         |
| 91C35_rebound_W3-3HG-012317-C5_S53    |                       |                       |                                                       |                       |         |         |
| 91C35_rebound_W3-3HG-012317-C9_S54    |                       |                       |                                                       |                       |         |         |
| 91C35_rebound_W3-3HG-012317-C11_S56   |                       |                       |                                                       |                       |         |         |
| 91C35_rebound_W3-3HG-012317-E4_S59    |                       |                       |                                                       |                       |         |         |
| ★ 91C35_B3                            |                       |                       |                                                       |                       |         |         |
| 91C35_rebound_W3-3HG-012317-F7_S61    |                       |                       |                                                       |                       |         |         |
| 91C35_rebound_W3-3HG-012317-G10_S63   |                       |                       |                                                       |                       |         |         |
| 91C35_rebound_W3-3HG-012317-H8_S65    |                       |                       |                                                       |                       |         |         |
| 91C35_rebound_W3-3HG-012317-H9_S66    |                       |                       |                                                       |                       |         |         |
| 91C35_rebound_W3-3HG-030217P5-G12_S3  |                       |                       |                                                       |                       |         |         |
| 91C35_rebound_W3-3HG-030617P3-A12_S14 |                       |                       |                                                       |                       |         |         |
| ★ 91C35_B2                            |                       |                       |                                                       |                       |         |         |
| 91C35_rebound_W3-3HG-030617P3-F2_S16  |                       |                       |                                                       |                       |         |         |
| 91C35_rebound_W3-3HG-030617P4-A3_S17  |                       |                       |                                                       |                       |         |         |
| ★ 91C35_B5                            |                       |                       |                                                       |                       |         |         |
| 91C35_rebound_W3-3HG-030817P2-G6_S20  |                       |                       |                                                       |                       |         |         |
| 91C35_rebound_W3-3HG-031317-A4_S21    |                       |                       |                                                       |                       |         |         |
| 91C35_rebound_W3-3HG-031317-B3_S23    |                       |                       |                                                       |                       |         |         |
| 91C35_rebound_W3-3HG-031317-B4_S24    |                       |                       |                                                       |                       |         |         |
| 91C35_rebound_W3-3HG-031317-D8_S27    |                       |                       |                                                       |                       |         |         |
| 91C35_rebound_W3-3HG-031317-E5_S28    |                       |                       |                                                       |                       |         |         |
| 91C35_rebound_W3-3HG-031317-G9_S30    |                       |                       |                                                       |                       |         |         |
| 91C35_rebound_W3-3HG-031317-G10_S31   |                       |                       |                                                       |                       |         |         |



Supplementary Figure S6. Viral sequence analysis (continued)

91C33

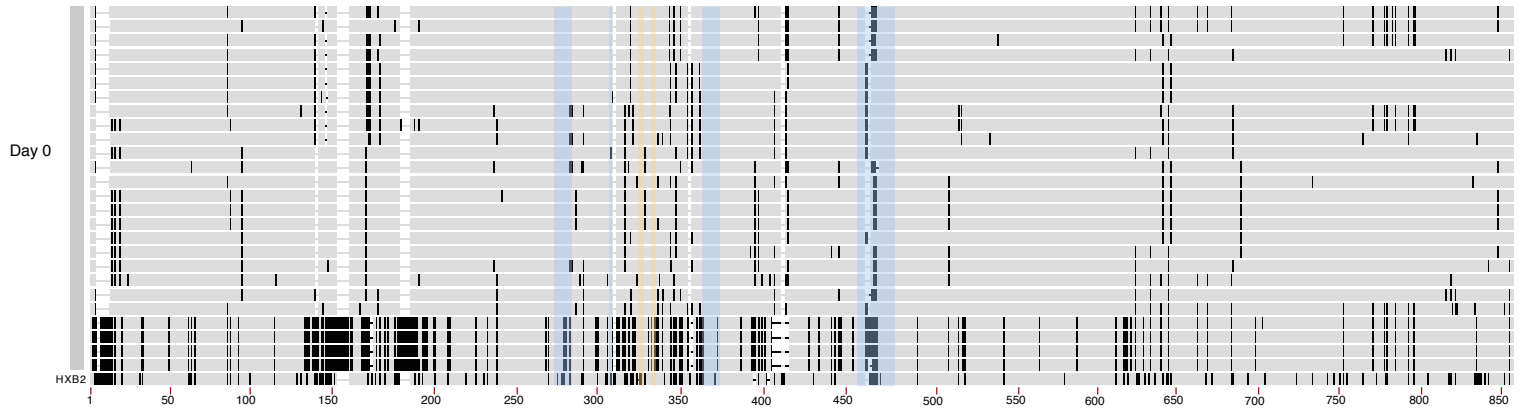

|                          | 274-283 (D loop)    | 308     | 364-374 (CD4 binding loop) | 455-475 (β23 V5 loop)                           | 324-327 | 332-334 |
|--------------------------|---------------------|---------|----------------------------|-------------------------------------------------|---------|---------|
| HXB2                     | S V N F T D N A K T | R       | S S G G D P E V T H        | T R D G G N - - - S N N E S E I F R P G G G D M | G N M R | N I S   |
| 91C33_D0_consensus       | S E N F S N N A K I | H       | H S G G D P E V V T H      | T R D G G N - - - N S S A N E T F R P G G G D M | G D I R | N I S   |
| 91C33_D0_9-4-c4_S46      | .                   | .       | .                          | . . . . . N H T . . . . .                       | .       | .       |
| 91C33_D0_9-6-d2b_S80     | .                   | .       | .                          | . . . . . N H T . . . . .                       | .       | .       |
| 91C33_D0_9-6-e8b_S86     | .                   | .       | .                          | . . . . . N H T . . . . .                       | .       | .       |
| 91C33_D0_abplate-a4b_S74 | .                   | .       | .                          | . . . . . N H T . . . . .                       | .       | .       |
| 91C33_D0_9-6-d4b_S81     | .                   | .       | .                          | . . . . . S G - . . . . .                       | .       | .       |
| * 91C33_A3               | .                   | .       | .                          | . . . . . S G - . . . . .                       | .       | .       |
| 91C33_D0_9-6-g8_S36      | .                   | .       | .                          | . . . . . S G - . . . . .                       | .       | .       |
| 91C33_D0_23-8-h4b_S72    | .                   | T       | .                          | . . . . . S G - . . . . .                       | .       | .       |
| 91C33_D0_9-4-a10_S44     | .                   | .       | .                          | . . . . . S G - . . . . .                       | .       | .       |
| 91C33_D0_9-6-e1b_S84     | .                   | T       | .                          | . . . . . S G - . . . . .                       | .       | .       |
| 91C33_D0_9-6-g7_S35      | .                   | N       | .                          | . . . . . S G - . . . . .                       | .       | .       |
| 91C33_D0_9-4-b10_S45     | .                   | T       | .                          | . . . . . - - - H T N - . . . . .               | .       | .       |
| 91C33_D0_9-6-c1b_S79     | .                   | .       | .                          | . . . . . - - - T N . . . . .                   | .       | .       |
| 91C33_D0_9-6-A5_S16      | .                   | .       | .                          | . . . . . - - - T N . . . . .                   | .       | .       |
| 91C33_D0_9-6-f10b_S91    | .                   | .       | .                          | . . . . . - - - T N . . . . .                   | .       | .       |
| * 91C33_A5               | .                   | .       | .                          | . . . . . - - - T N . . . . .                   | .       | .       |
| * 91C33_A4               | .                   | .       | .                          | . . . . . S G - . . . . .                       | .       | .       |
| 91C33_D0_9-6-f2_S28      | .                   | .       | .                          | . . . . . - - - T N . . . . .                   | .       | .       |
| 91C33_D0_9-6-g3b_S93     | .                   | T       | .                          | . . . . . - - - T N . . . . .                   | .       | .       |
| 91C33_D0_9-6-g11_S38     | .                   | .       | .                          | . . . . . - - - T N . . . . .                   | .       | .       |
| 91C33_D0_9-6-h3_S40      | .                   | .       | .                          | . . . . . - - - N H T . . . . .                 | .       | .       |
| 91C33_D0_23-8-d10_S8     | .                   | .       | .                          | . . . . . S G - . . . . .                       | .       | .       |
| * 91C33_A6               | .                   | A S H N | S . . . . . M . . . . .    | . . . . . K T N T T E T F . . . . .             | .       | T N     |
| 91C33_D0_23-8-g7_S10     | .                   | A S H N | S . . . . . M . . . . .    | . . . . . K T N T T E T F . . . . .             | .       | T N     |
| * 91C33_A9               | .                   | A S H N | S . . . . . M . . . . .    | . . . . . K T N T P E T F . . . . .             | .       | T N     |
| 91C33_D0_9-6-f7_S30      | .                   | A S H N | S . . . . . M . . . . .    | . . . . . K T - - T E T F . . . . .             | .       | T N     |

Supplementary Figure S6. *Viral sequence analysis (continued)*

91C34

Day 0

Week 6

Rebound

HXB2

1 50 100 150 200 250 300 350 400 450 500 550 600 650 700 750 800 850

274-283 (D loop)

HXB2 S N F T D N A K T

364-374 (CD4 binding loop)

S S G G D P E I V T H

455-475 (β23 V5 loop)

T R D G G N S N N E - - - S E I F R P G G G D M

324-327

G N M R N I S

332-334

G D I R N I T

91C34\_D0\_consensus

91C34\_D0\_YBAC10\_S28

\* 91C34\_day0\_#2

91C34\_D0\_YBBO3\_S14

\* 91C34\_day0\_#4

91C34\_D0\_YBCB3\_S18

91C34\_D0\_YBCD3\_S20

91C34\_D0\_YBCG11\_S22

91C34\_D0\_YBD2\_S24

91C34\_D0\_YBDA3\_S1

91C34\_D0\_YBD4\_S2

91C34\_D0\_YBDB1\_S3

91C34\_D0\_YBDC12\_S4

\* 91C34\_day0\_#10

\* 91C34\_day0\_#1

91C34\_w6\_Plat22C12\_S36

91C34\_w6\_Plate1-D7\_S28

91C34\_w6\_Plate1-D12\_S29

91C34\_w6\_Plate2A2\_S33

91C34\_w6\_Plate2A3\_S34

91C34\_w6\_Plate2B8\_S35

91C34\_w6\_Plate2E3\_S38

91C34\_w6\_Plate2G11\_S51

91C34\_w6\_Plate2H2\_S42

\* 91C34\_W6#4

91C34\_w6\_Plate3A11\_S44

91C34\_w6\_Plate3B1\_S45

91C34\_w6\_Plate3B12\_S46

91C34\_w6\_Plate3E3\_S48

91C34\_w6\_Plate3F2\_S49

91C34\_w6\_Plate3F3\_S50

\* 91C34\_W6#6

91C34\_w6\_Plate4B7\_S53

91C34\_w6\_Plate4E5\_S54

91C34\_w6\_Plate4G8\_S56

91C34\_w6\_Plate4H11\_S57

91C34\_w6\_Plate4J2\_S58

91C34\_w6\_Plate4A6\_S59

91C34\_w6\_Plate5B1\_S60

91C34\_w6\_Plate5C7\_S61

91C34\_w6\_Plate5C8\_S62

91C34\_w6\_Plate6A5\_S63

91C34\_w6\_Plate6B4\_S67

91C34\_w6\_Plate6C5\_S68

91C34\_w6\_Plate6D6\_S69

91C34\_w6\_Plate6D12\_S72

91C34\_w6\_PlateF4\_S30

91C34\_w6\_PlateG6\_S31

91C34\_w6\_PlateH11\_S32

91C34\_w6\_W6C87\_S77

91C34\_w6\_W69C0A1\_S73

91C34\_w6\_W69C0A8\_S76

91C34\_rebound\_w12\_11\_S47

91C34\_rebound\_w12\_24831-A3\_S12

91C34\_rebound\_w12\_24831-A5\_S13

91C34\_rebound\_w12\_24831-A12\_S17

\* 91C34\_w12\_#4

91C34\_w12\_#8

91C34\_rebound\_w12\_24831-B10\_S21

\* 91C34\_W12\_#1

91C34\_rebound\_w12\_24831-C2\_S2

\* 91C34\_W12#2

\* 91C34\_w12\_#7

91C34\_rebound\_w12\_24831-d2\_S7

91C34\_rebound\_w12\_24831-d7\_S9

\* 91C34\_w12\_#5

91C34\_rebound\_w12\_plate7-D1\_S25

91C34\_rebound\_w12\_w12-1-a3\_S9

91C34\_rebound\_w12\_w12-1-a6\_S10

91C34\_rebound\_w12\_w12-1-b3\_S13

91C34\_rebound\_w12\_w12-2-a5\_S1

91C34\_rebound\_w12\_w12-2-a11\_S3

91C34\_rebound\_w12\_w12-2-b1\_S5

\* 91C34\_w12\_#6

91C34\_rebound\_w12\_w12-2-b6\_S17

91C34\_rebound\_w12\_w12-2-c3\_S19

Day 0

Week 6

Rebound

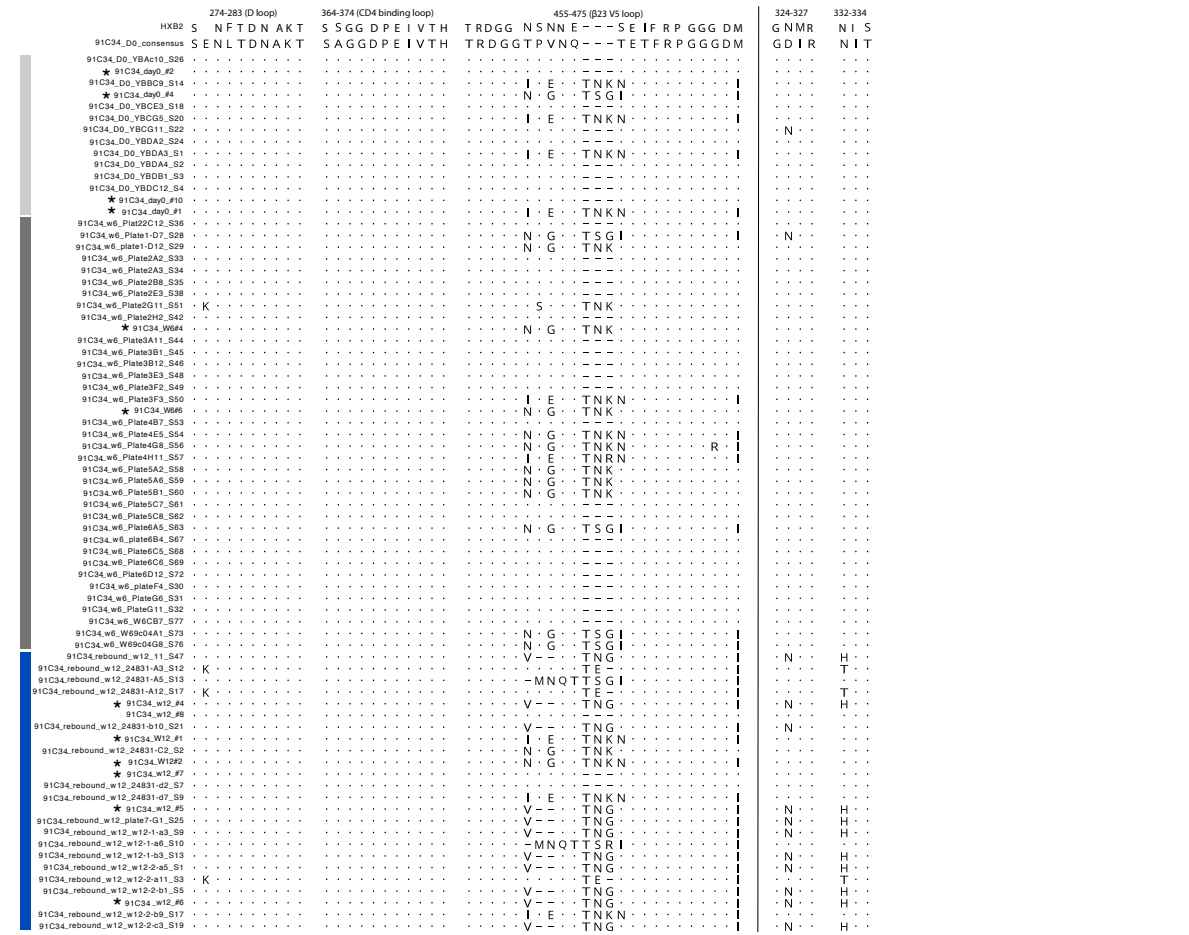

Supplementary Figure S6. Viral sequence analysis (continued)

9341

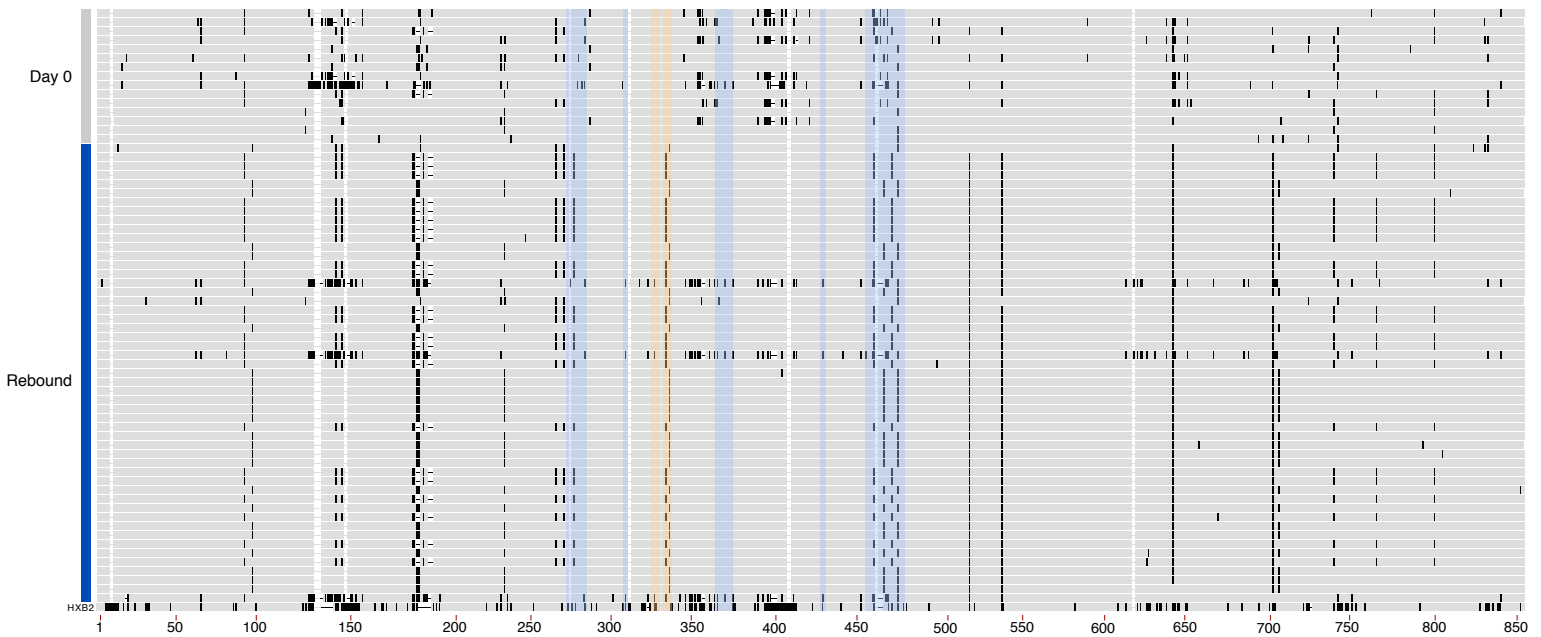

|                        | 274-283 (D loop) | 308   | 364-374 (CD4 binding loop) | 428-430 | 455-475 (β23 V5 loop)            | 324-327 | 332-334  |
|------------------------|------------------|-------|----------------------------|---------|----------------------------------|---------|----------|
| HXB2                   | S - VNF T DN AKT | R     | S SGGDPEI VTH              | QKV     | TRDGGNS - - - - NNESEIFRP        | GGGDM   | GNMR NIS |
| 9341_D0_consensus      | - DNLTDNAKN      | H     | PSGGDPEI VRL               | QEV     | TRDGGNN - - - - NDTNNETETFR      | PAGGNM  | GDIR NIS |
| 9341_D0_1-2812A3_S72   | .....            | ..... | .....                      | .....   | .....DT - - V - - K -            | .....   | .....    |
| 9341_D0_1-2812A11_S74  | .....            | ..... | .....                      | .....   | .....KGA - E - D - K -           | .....   | .....    |
| *9341_A12              | .....            | ..... | .....                      | .....   | .....T - - - - - - - - - I -     | .....   | .....    |
| 9341_D0_1-2812B11_S79  | .....            | ..... | .....                      | .....   | .....T - - - - - - - - - E -     | .....   | .....    |
| 9341_D0_1A-1118E9_S96  | .....            | ..... | .....                      | .....   | .....T - - - - - - - - - E -     | .....   | .....    |
| 9341_D0_1A-1118F5_S89  | .....            | ..... | .....                      | .....   | .....T - - - - - - - - - K - G - | .....   | .....    |
| *9341_B2A              | .....            | ..... | .....                      | .....   | .....T - - - - - - - - - K - G - | .....   | .....    |
| *9341_A5               | .....            | ..... | .....                      | .....   | .....T - - - - - - - - - V - - - | .....   | .....    |
| *9341_B4               | .....            | ..... | .....                      | .....   | .....T - - - - - - - - - V - - - | .....   | .....    |
| 9341_D0_1A-1118H7_S82  | .....            | ..... | .....                      | .....   | .....T - - - - - - - - - V - - - | .....   | .....    |
| 9341_D0_1A-1118H8_S83  | .....            | ..... | .....                      | .....   | .....T - - - - - - - - - V - - - | .....   | .....    |
| *9341_B5               | .....            | ..... | .....                      | .....   | .....T - - - - - - - - - V - - - | .....   | .....    |
| 9341_D0_1b-1118G7_S87  | .....            | ..... | .....                      | .....   | .....T - - - - - - - - - - - - - | .....   | .....    |
| 9341_D0_1b-1118G11_S68 | .....            | ..... | .....                      | .....   | .....T - - - - - - - - - - - - - | .....   | .....    |
| 9341_D0_1b-1118H5_S71  | .....            | ..... | .....                      | .....   | .....T - - - - - - - - - - - - - | .....   | .....    |
| 9341_w4_1-8-E2_S32     | .....            | ..... | .....                      | .....   | .....T - - - - - - - - - - - - - | .....   | .....N   |
| 9341_w4_1-8-E4_S33     | .....            | ..... | .....                      | .....   | .....T - - - - - - - - - - - - - | .....   | .....N   |
| 9341_w4_1-8-F2_S34     | .....            | ..... | .....                      | .....   | .....T - - - - - - - - - - - - - | .....   | .....N   |
| 9341_w4_aA2_S1         | .....            | ..... | .....                      | .....   | .....T - - - - - - - - - - - - - | .....   | .....N   |
| 9341_w4_aA4_S2         | .....            | ..... | .....                      | .....   | .....T - - - - - - - - - - - - - | .....   | .....N   |
| 9341_w4_aA7_S4         | .....            | ..... | .....                      | .....   | .....T - - - - - - - - - - - - - | .....   | .....N   |
| 9341_w4_aA8_S5         | .....            | ..... | .....                      | .....   | .....T - - - - - - - - - - - - - | .....   | .....N   |
| 9341_w4_aA10_S6        | .....            | ..... | .....                      | .....   | .....T - - - - - - - - - - - - - | .....   | .....N   |
| 9341_w4_aB5_S7         | .....            | ..... | .....                      | .....   | .....T - - - - - - - - - - - - - | .....   | .....N   |
| 9341_w4_ab10_S9        | .....            | ..... | .....                      | .....   | .....T - - - - - - - - - - - - - | .....   | .....N   |
| 9341_w4_aD7_S12        | .....            | ..... | .....                      | .....   | .....T - - - - - - - - - - - - - | .....   | .....N   |
| 9341_w4_aG7_S13        | .....            | ..... | .....                      | .....   | .....T - - - - - - - - - - - - - | .....   | .....N   |
| 9341_w4_BA3_S14        | .....            | ..... | .....                      | .....   | .....T - - - - - - - - - - - - - | .....   | .....N   |
| 9341_w4_BA4_S15        | .....            | ..... | .....                      | .....   | .....T - - - - - - - - - - - - - | .....   | .....N   |
| 9341_w4_BA6_S17        | .....            | ..... | .....                      | .....   | .....T - - - - - - - - - - - - - | .....   | .....N   |
| 9341_w4_BA7_S18        | .....            | ..... | .....                      | .....   | .....T - - - - - - - - - - - - - | .....   | .....N   |
| 9341_w4_BB1_S19        | .....            | ..... | .....                      | .....   | .....T - - - - - - - - - - - - - | .....   | .....N   |
| 9341_w4_BB2_S20        | .....            | ..... | .....                      | .....   | .....T - - - - - - - - - - - - - | .....   | .....N   |
| *9341_B2               | .....            | ..... | .....                      | .....   | .....T - - - - - - - - - - - - - | .....   | .....N   |
| 9341_w4_BB6_S22        | .....            | ..... | .....                      | .....   | .....T - - - - - - - - - - - - - | .....   | .....N   |
| 9341_w4_BD9_S25        | .....            | ..... | .....                      | .....   | .....T - - - - - - - - - - - - - | .....   | .....N   |
| 9341_w4_CD6_S26        | .....            | ..... | .....                      | .....   | .....T - - - - - - - - - - - - - | .....   | .....N   |
| 9341_w4_CD8_S27        | .....            | ..... | .....                      | .....   | .....T - - - - - - - - - - - - - | .....   | .....N   |
| 9341_w4_CD9_S28        | .....            | ..... | .....                      | .....   | .....T - - - - - - - - - - - - - | .....   | .....N   |
| 9341_w4_CD3_S29        | .....            | ..... | .....                      | .....   | .....T - - - - - - - - - - - - - | .....   | .....N   |
| 9341_w4_CD2_S30        | .....            | ..... | .....                      | .....   | .....T - - - - - - - - - - - - - | .....   | .....N   |
| 9341_w4_CD8_S31        | .....            | ..... | .....                      | .....   | .....T - - - - - - - - - - - - - | .....   | .....N   |
| 9341_w5_1-8-C1_S50     | .....            | ..... | .....                      | .....   | .....T - - - - - - - - - - - - - | .....   | .....N   |
| 9341_w5_1-8-C3_S52     | .....            | ..... | .....                      | .....   | .....T - - - - - - - - - - - - - | .....   | .....N   |
| 9341_w5_1-8-C4_S53     | .....            | ..... | .....                      | .....   | .....T - - - - - - - - - - - - - | .....   | .....N   |
| 9341_w5_1-8-C6_S54     | .....            | ..... | .....                      | .....   | .....T - - - - - - - - - - - - - | .....   | .....N   |
| 9341_w5_1-8-C7_S55     | .....            | ..... | .....                      | .....   | .....T - - - - - - - - - - - - - | .....   | .....N   |
| 9341_w5_1-8-D1_S59     | .....            | ..... | .....                      | .....   | .....T - - - - - - - - - - - - - | .....   | .....N   |
| 9341_w5_1-8-D4_S61     | .....            | ..... | .....                      | .....   | .....T - - - - - - - - - - - - - | .....   | .....N   |
| 9341_w5_1-8-D6_S62     | .....            | ..... | .....                      | .....   | .....T - - - - - - - - - - - - - | .....   | .....N   |
| 9341_w5_1-8-E12_S68    | .....            | ..... | .....                      | .....   | .....T - - - - - - - - - - - - - | .....   | .....N   |
| 9341_w5_1-8-F5_S66     | .....            | ..... | .....                      | .....   | .....T - - - - - - - - - - - - - | .....   | .....N   |
| 9341_w5_1-8-F6_S70     | .....            | ..... | .....                      | .....   | .....T - - - - - - - - - - - - - | .....   | .....N   |
| 9341_w5_1-8-G3_S73     | .....            | ..... | .....                      | .....   | .....T - - - - - - - - - - - - - | .....   | .....N   |
| 9341_w5_1-8-G6_S74     | .....            | ..... | .....                      | .....   | .....T - - - - - - - - - - - - - | .....   | .....N   |
| *9341_B7               | .....            | ..... | .....                      | .....   | .....T - - - - - - - - - - - - - | .....   | .....N   |
| 9341_w5_aD7_S37        | .....            | ..... | .....                      | .....   | .....T - - - - - - - - - - - - - | .....   | .....N   |
| *9341_B5               | .....            | ..... | .....                      | .....   | .....T - - - - - - - - - - - - - | .....   | .....N   |
| *9341_B6               | .....            | ..... | .....                      | .....   | .....T - - - - - - - - - - - - - | .....   | .....N   |
| 9341_w5_bb10_S41       | .....            | ..... | .....                      | .....   | .....T - - - - - - - - - - - - - | .....   | .....N   |
| 9341_w5_BE2_S42        | .....            | ..... | .....                      | .....   | .....T - - - - - - - - - - - - - | .....   | .....N   |
| 9341_w5_BE7_S44        | .....            | ..... | .....                      | .....   | .....T - - - - - - - - - - - - - | .....   | .....N   |
| 9341_w5_BE9_S45        | .....            | ..... | .....                      | .....   | .....T - - - - - - - - - - - - - | .....   | .....N   |
| 9341_w5_BE11_S46       | .....            | ..... | .....                      | .....   | .....T - - - - - - - - - - - - - | .....   | .....N   |
| 9341_w5_BE12_S47       | .....            | ..... | .....                      | .....   | .....T - - - - - - - - - - - - - | .....   | .....N   |
| 9341_w5_bI7_S49        | .....            | ..... | .....                      | .....   | .....T - - - - - - - - - - - - - | .....   | .....N   |

Supplementary Figure S6. Viral sequence analysis (continued)

9342

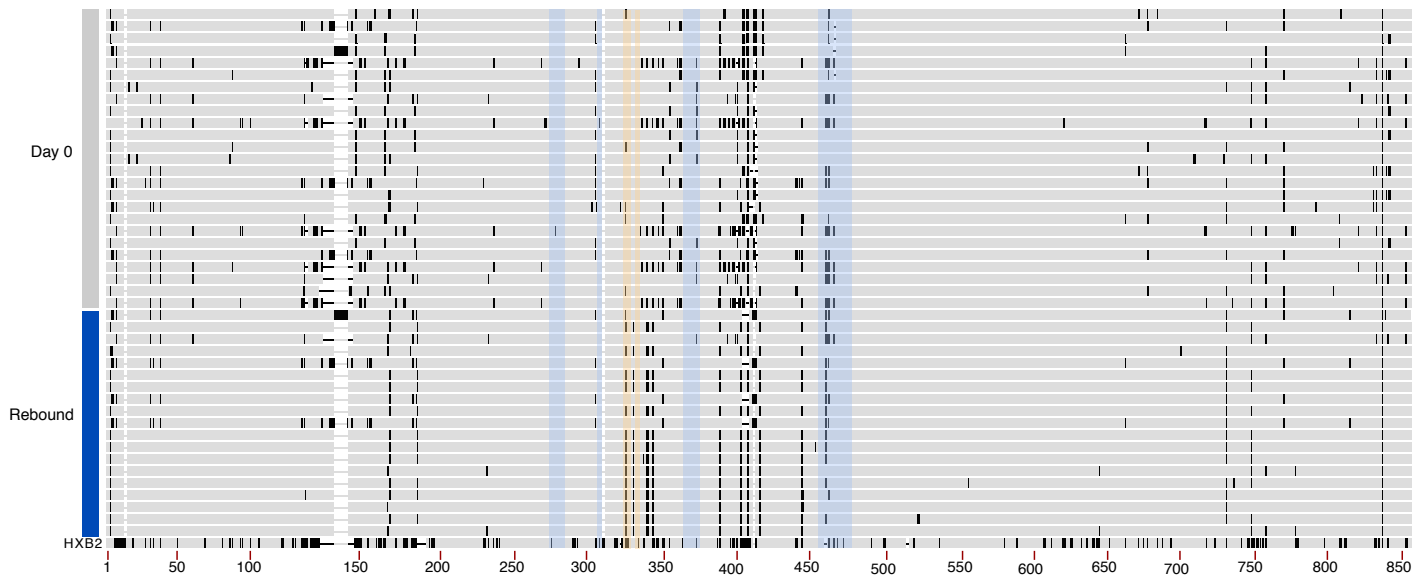

|                                  | 274-283 (D loop)    | 308 | 364-374 (CD4 binding loop) | 455-475 (β23 V5 loop)                       | 324-327 | 332-334 |
|----------------------------------|---------------------|-----|----------------------------|---------------------------------------------|---------|---------|
| HXB2                             | S V N F T D N A K T | R   | S S G G D P E I V T H      | T R D G G - N S N N E S E I F R P G G G D M | G N M R | N I S   |
| 9342_D0_consensus                | S S N F T D N A K T | H   | S S G G D P E I V M H      | T R D G G G N N T N N N E T F R P T G G D M | G D I R | N L S   |
| 9342_D0_2-2812a6_S1              | .                   | .   | .                          | S                                           | .       | .       |
| 9342_D0_2-2812B3_S2              | .                   | .   | .                          | S                                           | .       | .       |
| 9342_D0_2-2812B9_S3              | .                   | .   | .                          | S                                           | .       | .       |
| 9342_D0_2-2812d3_S5              | .                   | .   | .                          | .                                           | .       | .       |
| 9342_D0_2-3012A1_S6              | .                   | .   | R                          | R G T S T T                                 | .       | .       |
| 9342_D0_2-3012A4_S7              | .                   | .   | .                          | S                                           | .       | .       |
| 9342_D0_2-3012A5_S8              | .                   | .   | G                          | .                                           | .       | .       |
| 9342_D0_2-3012A6_S9              | .                   | .   | G                          | R G T S T T                                 | .       | .       |
| * 9342_B6                        | .                   | .   | G                          | .                                           | .       | .       |
| 9342_D0_2-3012b10_S11            | .                   | S   | R                          | E G T S T T                                 | .       | .       |
| 9342_D0_2-3012b11_S12            | .                   | .   | G                          | .                                           | .       | .       |
| 9342_D0_2-3012b12_S13            | .                   | .   | G                          | .                                           | N       | .       |
| 9342_D0_2-3012c4_S14             | .                   | .   | G                          | .                                           | .       | .       |
| * 9342_B7                        | .                   | .   | .                          | S S                                         | .       | .       |
| * 9342_B3                        | .                   | .   | .                          | S S                                         | .       | .       |
| * 9342_B5                        | .                   | .   | .                          | .                                           | .       | .       |
| * 9342_B8                        | .                   | .   | .                          | .                                           | N       | .       |
| 9342_D0_2-3012D9_S20             | .                   | .   | .                          | S                                           | N       | .       |
| * 9342_B2                        | .                   | K   | .                          | E G T S T T                                 | .       | .       |
| 9342_D0_2-3012E7_S23             | .                   | .   | G                          | .                                           | .       | .       |
| 9342_D0_2-3012g6_S28             | .                   | .   | .                          | S S                                         | .       | .       |
| * 9342_B1                        | .                   | .   | R                          | R G T S T T                                 | .       | .       |
| 9342_D0_2-3012g12_S30            | .                   | .   | G                          | R G T S T T                                 | .       | .       |
| 9342_D0_2-3012h1_S31             | .                   | .   | .                          | .                                           | N       | .       |
| 9342_D0_2-3012h2_S32             | .                   | .   | .                          | E G T S T T                                 | .       | .       |
| * 9342_A2                        | .                   | .   | .                          | S S                                         | G       | .       |
| 9342_rebound_w20_1-3-18-a3_S49   | .                   | .   | .                          | V                                           | N       | .       |
| * 9342_A1                        | .                   | .   | G                          | R G T S T T                                 | N       | .       |
| * 9342_A6                        | .                   | .   | .                          | .                                           | N       | .       |
| 9342_rebound_w20_1-3-18-e2_S53   | .                   | .   | .                          | S S                                         | .       | .       |
| 9342_rebound_w20_1-3-18-h5_S57   | .                   | .   | .                          | V                                           | K       | .       |
| 9342_rebound_w20_1-3-18-g6_S56   | .                   | .   | .                          | V                                           | K       | .       |
| * 9342_A3                        | .                   | .   | .                          | S S                                         | .       | .       |
| 9342_rebound_w20_1-3-18-b8_S51   | .                   | .   | .                          | V                                           | N       | .       |
| 9342_rebound_w20_notfull-e11_S62 | .                   | .   | .                          | S S                                         | .       | .       |
| 9342_rebound_w20_notfull-f11_S64 | .                   | .   | .                          | V                                           | N       | .       |
| 9342_rebound_w20_full-e2_S65     | .                   | .   | .                          | V                                           | N       | .       |
| 9342_rebound_w20_full-e10_S66    | .                   | .   | .                          | V                                           | N       | .       |
| 9342_rebound_w20_full-f8_S67     | .                   | .   | .                          | V                                           | N       | .       |
| * 9342_A8                        | .                   | .   | .                          | V                                           | N       | .       |
| 9342_rebound_w20_notfull-e4_S61  | .                   | .   | .                          | S                                           | N       | .       |
| 9342_rebound_w20_1_S73           | .                   | .   | .                          | .                                           | N       | .       |
| 9342_rebound_w20_4_S76           | .                   | .   | .                          | V                                           | N       | .       |
| 9342_rebound_w20_7_S79           | .                   | .   | .                          | .                                           | N       | .       |

Supplementary Figure S6. Viral sequence analysis (continued)

9343

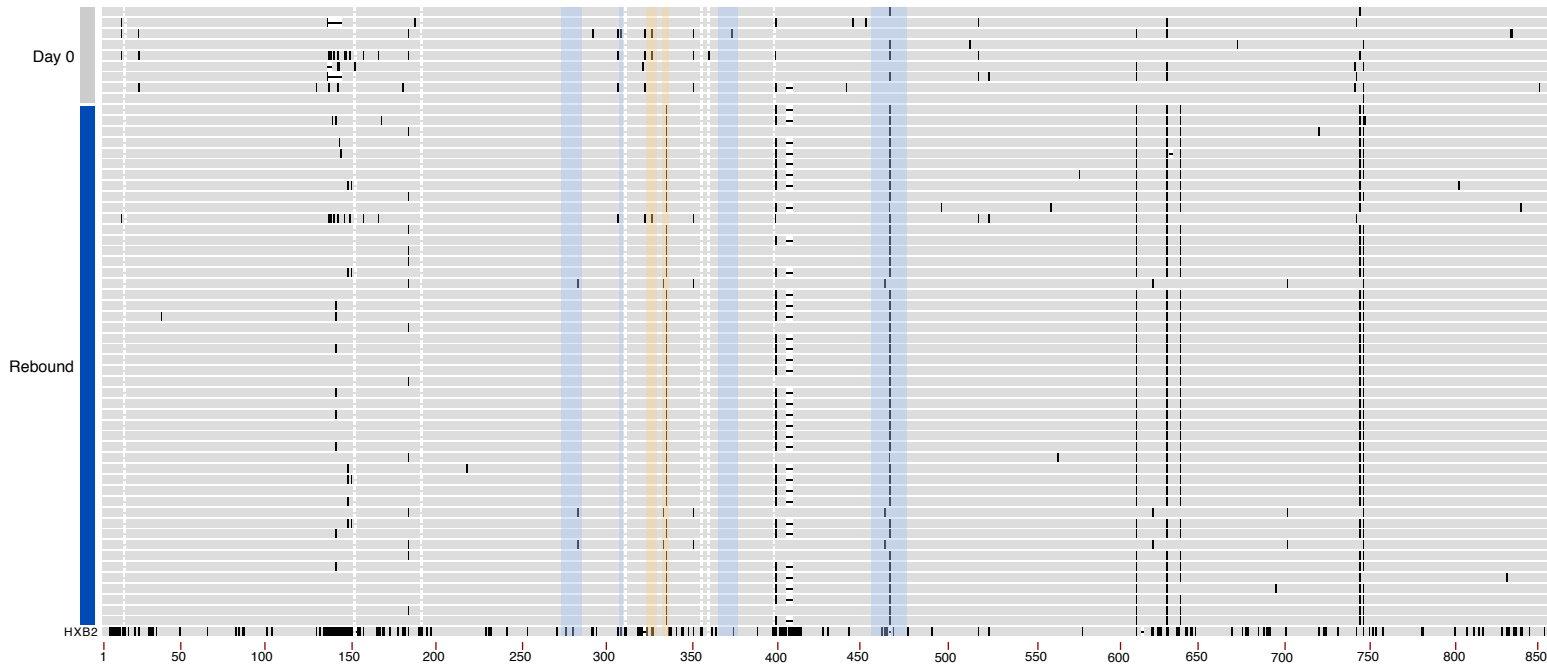

|                                | 274-283 (D loop)    | 308                   | 364-374 (CD4 binding loop)                  | 455-475 (beta23 V5 loop) | 324-327 | 332-334 |
|--------------------------------|---------------------|-----------------------|---------------------------------------------|--------------------------|---------|---------|
| HXB2                           | S N F T N A K T R   | S S G G D P E I V T H | T R D G G N S N N E S - E I F R P G G G D M | G N M R                  | N I S   |         |
| 9343_D0_consensus              | V D N               | S S G G D P E I V M H | T R D G G N N N D T S A E V F R P G G G D M | G D I R                  | N I S   |         |
| 9343_D0_3-2812-A2_S55          | S E N F T N N A K T | .                     | .                                           | T                        | .       |         |
| 9343_D0_3-2812-A11_S59         | .                   | .                     | .                                           | .                        | .       |         |
| *9343_A1                       | .                   | .                     | .                                           | .                        | .       |         |
| *9343_A6                       | .                   | .                     | .                                           | .                        | .       |         |
| 9343_D0_3-2812-d3_S63          | .                   | .                     | .                                           | T                        | .       |         |
| *9343_A3                       | .                   | .                     | .                                           | .                        | .       |         |
| *9343_A5                       | .                   | .                     | .                                           | T                        | .       |         |
| 9343_D0_3B-1118-f3_S52         | .                   | .                     | .                                           | .                        | .       |         |
| *9343_A8                       | .                   | .                     | .                                           | .                        | .       |         |
| 9343_rebound_w7_-24-1-a11_S84  | .                   | .                     | .                                           | T                        | .       |         |
| 9343_rebound_w7_-24-1-c12_S88  | .                   | .                     | .                                           | T                        | .       |         |
| 9343_rebound_w7_-24-1-e6_S91   | .                   | .                     | .                                           | T                        | .       |         |
| 9343_rebound_w7_-24-1-g7_S92   | .                   | .                     | .                                           | T                        | .       |         |
| 9343_rebound_w7_A-25-1-b4_S13  | .                   | .                     | .                                           | T                        | .       |         |
| 9343_rebound_w7_A-25-1-e8_S16  | .                   | .                     | .                                           | T                        | .       |         |
| 9343_rebound_w7_A-25-1-f6_S17  | .                   | .                     | .                                           | T                        | .       |         |
| 9343_rebound_w7_A-25-1-g10_S20 | .                   | .                     | .                                           | T                        | .       |         |
| 9343_rebound_w7_A-25-1-h1_S22  | .                   | .                     | .                                           | T                        | .       |         |
| 9343_rebound_w7_A-25-1-h4_S23  | .                   | .                     | .                                           | T                        | .       |         |
| 9343_rebound_w7_b-25-1-A8_S1   | .                   | .                     | .                                           | T                        | .       |         |
| 9343_rebound_w7_b-25-1-A11_S2  | .                   | .                     | .                                           | T                        | .       |         |
| 9343_rebound_w7_b-25-1-A12_S3  | .                   | .                     | .                                           | T                        | .       |         |
| *9343_B5                       | .                   | .                     | .                                           | T                        | .       |         |
| 9343_rebound_w7_b-25-1-B9_S5   | .                   | .                     | .                                           | T                        | .       |         |
| 9343_rebound_w7_b-25-1-d2_S7   | .                   | .                     | .                                           | T                        | .       |         |
| _rebound_w7_b-25-1-f12_S10     | .                   | .                     | .                                           | Y                        | .       |         |
| *9343_B9                       | .                   | E                     | .                                           | .                        | T       |         |
| 9343_rebound_w8_-24-1-c5_S67   | .                   | .                     | .                                           | T                        | .       |         |
| 9343_rebound_w8_-24-1-d4_S71   | .                   | .                     | .                                           | T                        | .       |         |
| 9343_rebound_w8_-24-1-d6_S72   | .                   | .                     | .                                           | T                        | .       |         |
| 9343_rebound_w8_-24-1-d7_S73   | .                   | .                     | .                                           | T                        | .       |         |
| 9343_rebound_w8_-24-1-e3_S74   | .                   | .                     | .                                           | T                        | .       |         |
| 9343_rebound_w8_-24-1-e4_S75   | .                   | .                     | .                                           | T                        | .       |         |
| 9343_rebound_w8_-24-1-f8_S77   | .                   | .                     | .                                           | T                        | .       |         |
| 9343_rebound_w8_-24-1-g11_S81  | .                   | .                     | .                                           | T                        | .       |         |
| 9343_rebound_w8_-25-1-A8_S25   | .                   | .                     | .                                           | T                        | .       |         |
| *9343_B6                       | .                   | .                     | .                                           | T                        | .       |         |
| 9343_rebound_w8_-25-1-A10_S27  | .                   | .                     | .                                           | T                        | .       |         |
| 9343_rebound_w8_-25-1-A11_S28  | .                   | .                     | .                                           | T                        | .       |         |
| 9343_rebound_w8_-25-1-b1_S29   | .                   | .                     | .                                           | T                        | .       |         |
| 9343_rebound_w8_-25-1-b7_S31   | .                   | .                     | .                                           | T                        | .       |         |
| 9343_rebound_w8_-25-1-b10_S33  | .                   | .                     | .                                           | T                        | .       |         |
| 9343_rebound_w8_-25-1-b11_S34  | .                   | .                     | .                                           | T                        | .       |         |
| 9343_rebound_w8_-25-1-c3_S36   | .                   | .                     | .                                           | T                        | .       |         |
| 9343_rebound_w8_-25-1-c6_S37   | .                   | .                     | .                                           | T                        | .       |         |
| 9343_rebound_w8_-25-1-c7_S38   | .                   | .                     | .                                           | T                        | .       |         |
| 9343_rebound_w8_-25-1-c8_S39   | .                   | .                     | .                                           | T                        | .       |         |
| *9343_B4                       | .                   | E                     | .                                           | Y                        | T       |         |
| 9343_rebound_w8_-25-1-d3_S41   | .                   | .                     | .                                           | T                        | .       |         |
| *9343_B1                       | .                   | E                     | .                                           | Y                        | T       |         |
| *9343_B2                       | .                   | .                     | .                                           | T                        | .       |         |
| 9343_rebound_w8_-25-1-f4_S53   | .                   | .                     | .                                           | T                        | .       |         |
| 9343_rebound_w8_-25-1-f5_S54   | .                   | .                     | .                                           | T                        | .       |         |
| 9343_rebound_w8_-25-1-g6_S60   | .                   | .                     | .                                           | T                        | .       |         |
| 9343_rebound_w8_-25-1-g10_S61  | .                   | .                     | .                                           | T                        | .       |         |
| 9343_rebound_w8_-25-1-g12_S62  | .                   | .                     | .                                           | T                        | .       |         |
| 9343_rebound_w8_-25-1-h2_S63   | .                   | .                     | .                                           | T                        | .       |         |

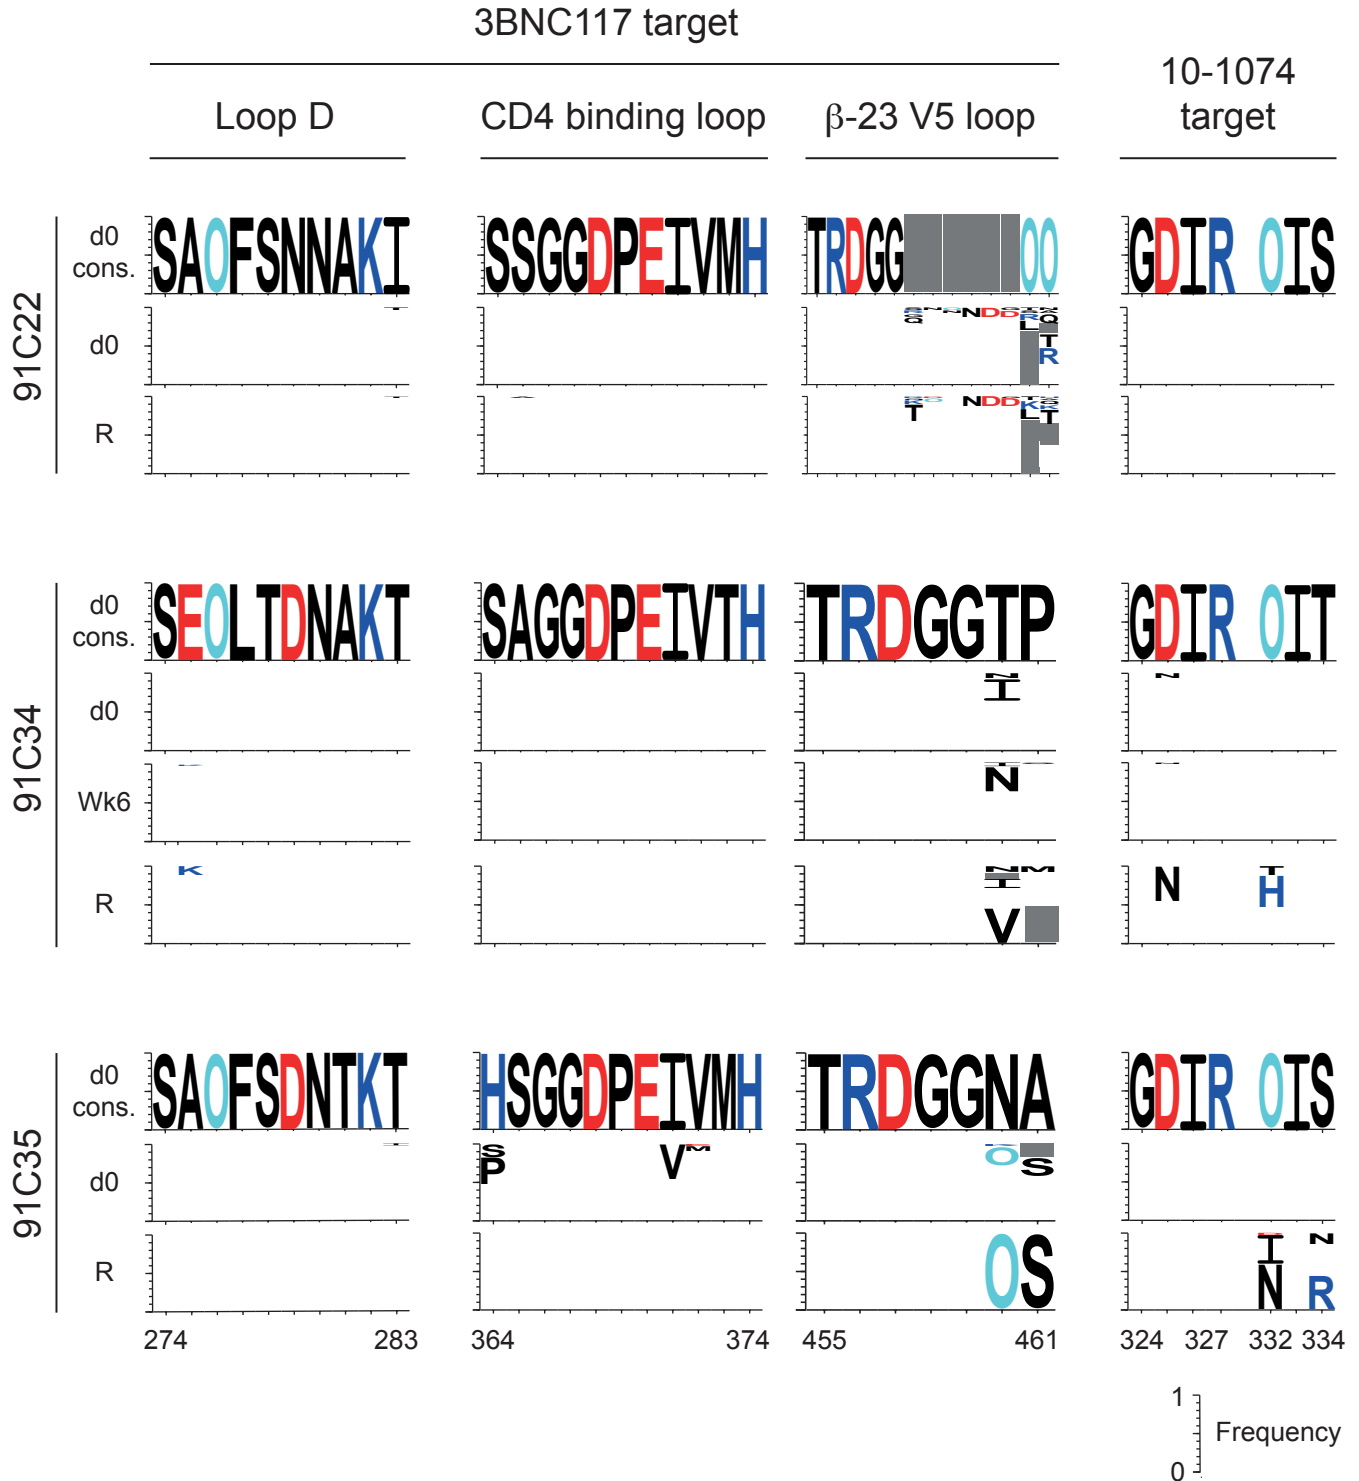

**Supplementary Figure 7.** *HIV-1 env* sequence logo plots

Logo plots of SGA-derived plasma HIV-1 Env amino acid frequencies at and around 3BNC117 and 10-1074 contact residues over time during 3BNC117/10-1074 combination therapy and compared to the day 0 consensus sequence (d0 cons.). Frequency is shown by the height of the letter. d0 indicates sequences obtained on day 0 pre-infusion, Wk6 indicates sequences obtained six weeks after the first antibody infusion and R indicates sequences obtained at viral rebound. White space indicates the lack of a change compared to the day 0 consensus. Single-letter amino acids highlight a change compared to day 0 and are colored for acidic (red) and basic (blue) amino acids. Turquoise “O” indicates an asparagine that acts as potential glycosylation site. Grey boxes indicate gaps. Logo plots were generated using LASSIE.

3BNC117 target

10-1074 target

Loop D

CD4 binding loop

$\beta$ -23 V5 loop

9341

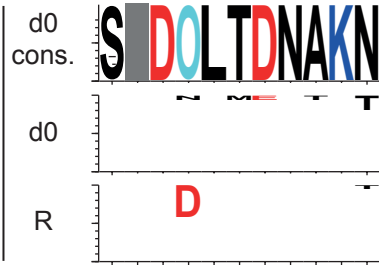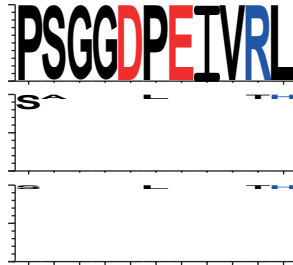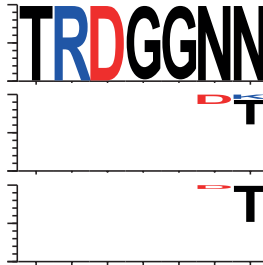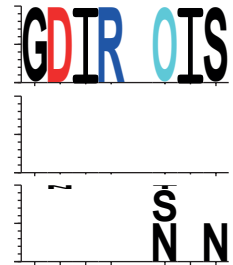

9342

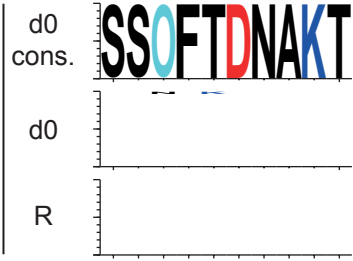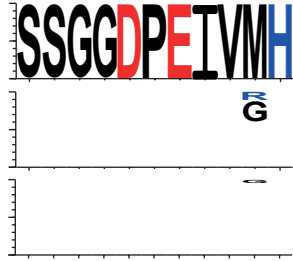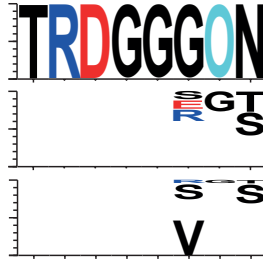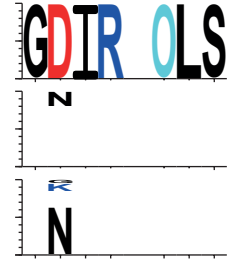

9343

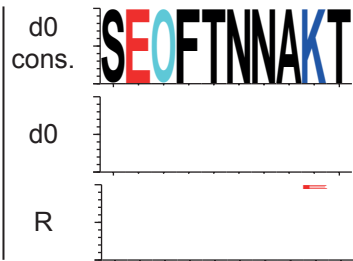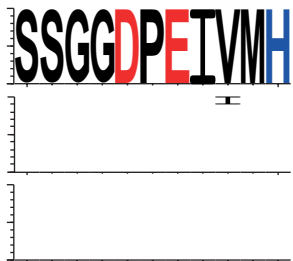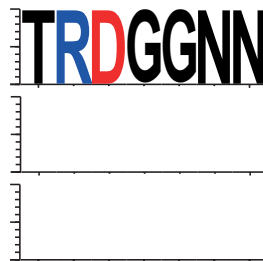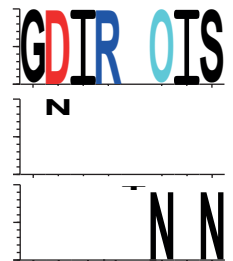

274

283

364

374

455

461

324

327

332

334

1  
0  
Frequency

Supplementary Figure 7. HIV-1 env sequence logo plots (continued)

# 91C35

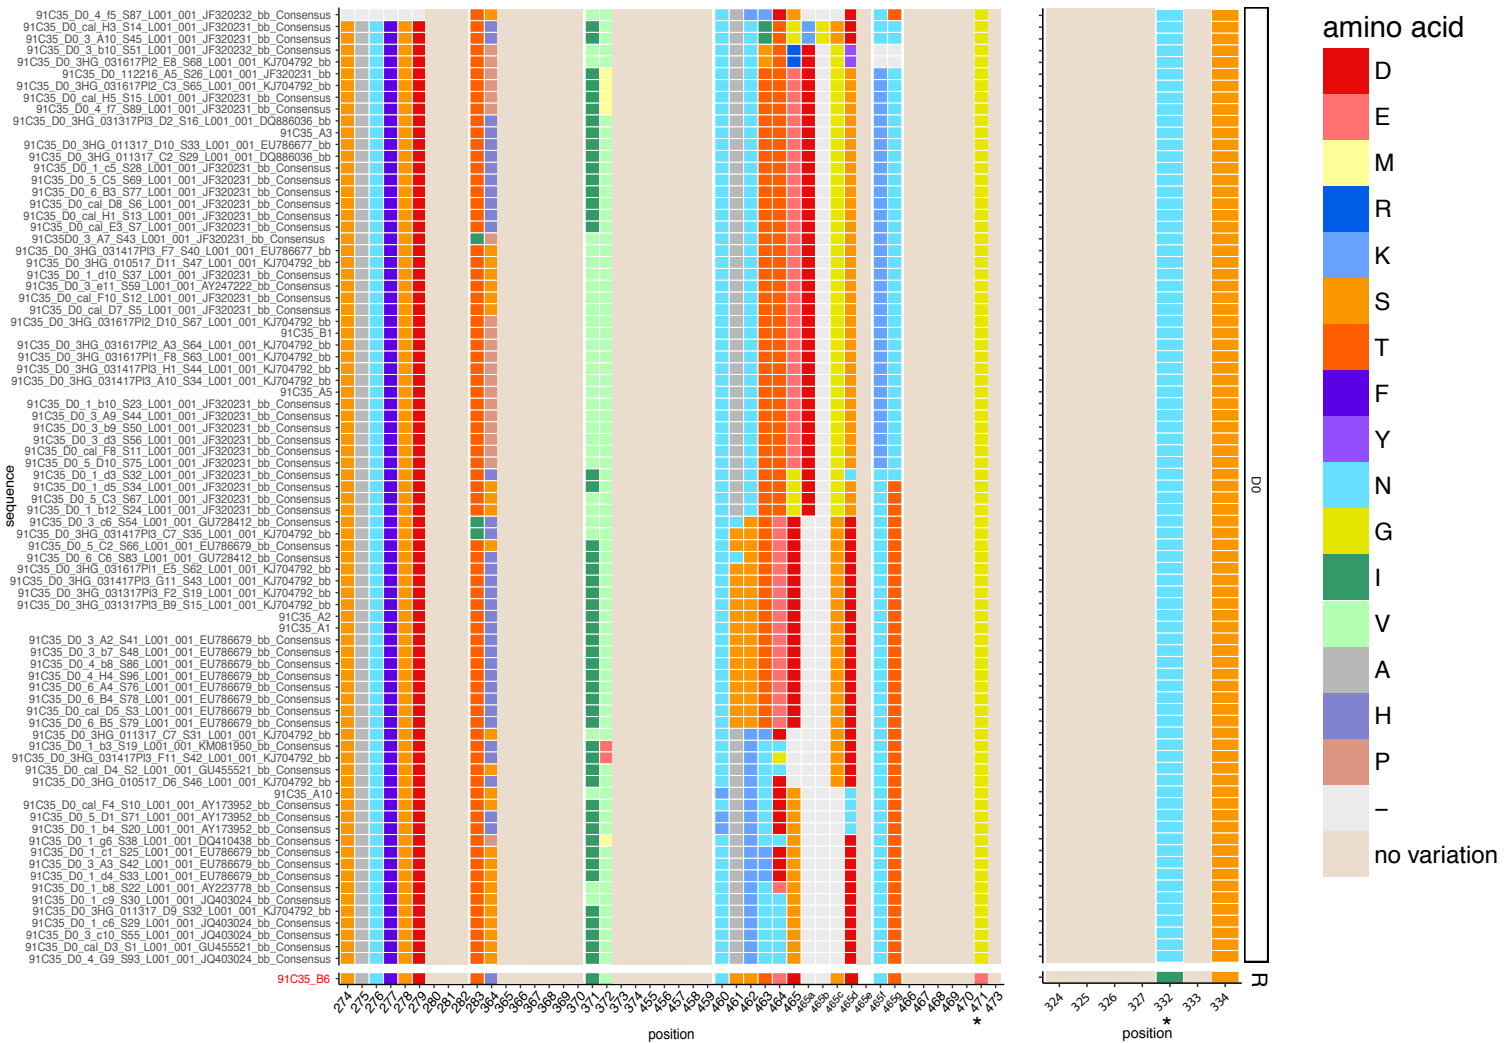

**Supplementary figure S8.** In-depth analysis of 3BNC117 and 10-1074 binding site mutations in participants 91C35 and 9341

Amino acids in and around known 3BNC117 and 10-1074 contact residues in Env sequences isolated by SGS from participants 91C35 and 9341. Amino acids are numbered according to HXB2. Upper panel shows sequences isolated from day 0 viruses and the bottom row depicts Env amino acids in resistant rebound virus. \* represent instances in which an amino acid was found in the resistant rebound virus but not in day 0 sequences. The resistant rebound virus is highlighted in red.



9341

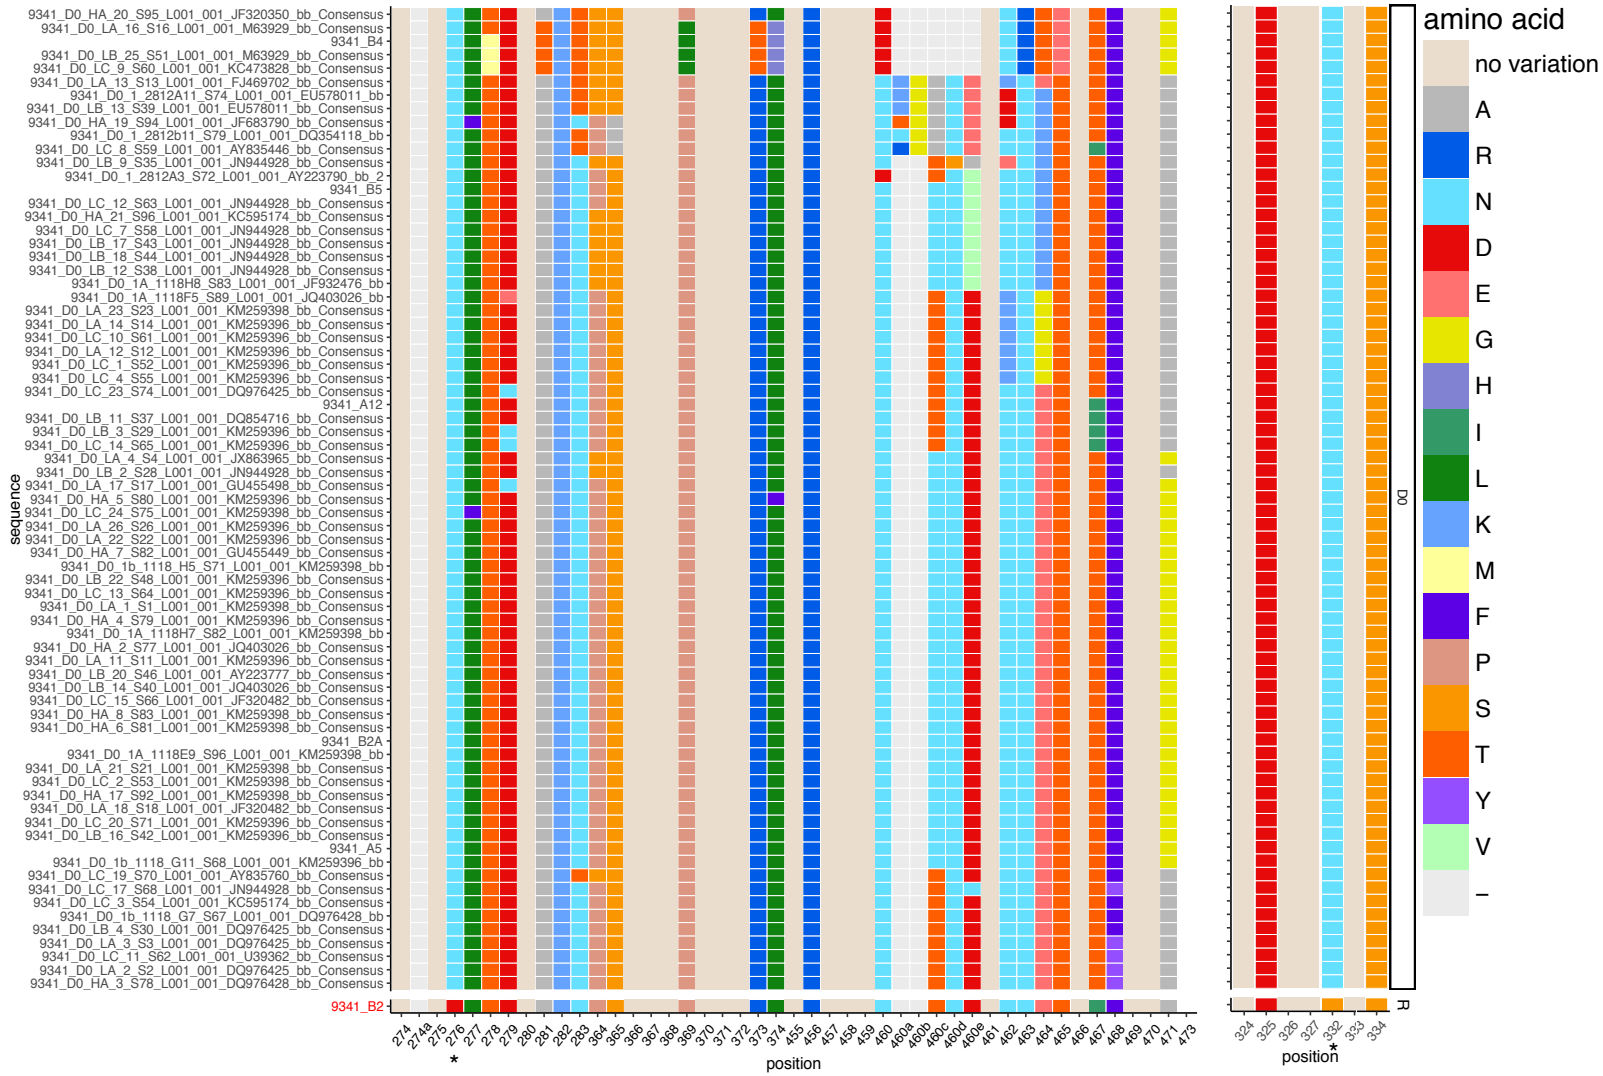

Supplementary figure S8. In-depth analysis of 3BNC117 binding site mutations in patients 91C35 and 9341 (continued)

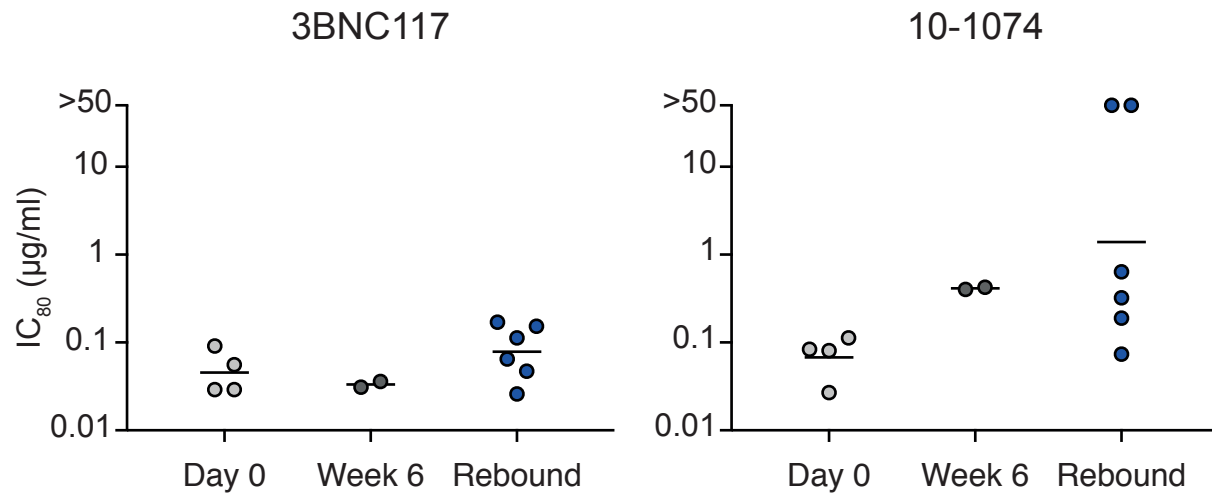

**Supplementary Figure 9.** *Pseudovirus sensitivities of participant 91C34*

IC<sub>80</sub>s of pseudoviruses constructed from SGA-derived *env* sequences (day 0, *n*=4; week 6, *n*=2; rebound, *n*=6) obtained at the indicated time points against 3BNC117 (left) and 10-1074 (right) determined in TZM-bl neutralization assay. Line indicates geometric mean IC<sub>80</sub> and each circle indicates a single pseudovirus.

**Supplementary Table 1. BNab sensitivities of bulk culture-derived viruses from viremic individuals**

**a** Pre-screening individual results

| Trial ID | Pre-Screen ID | 3BNC117          |                  | 10-1074          |                  | Pre-Screen ID | 3BNC117          |                  | 10-1074          |                  | µg/ml      |
|----------|---------------|------------------|------------------|------------------|------------------|---------------|------------------|------------------|------------------|------------------|------------|
|          |               | IC <sub>50</sub> | IC <sub>80</sub> | IC <sub>50</sub> | IC <sub>80</sub> |               | IC <sub>50</sub> | IC <sub>80</sub> | IC <sub>50</sub> | IC <sub>80</sub> |            |
| 91C22    | B321          | 0.084            | 0.187            | 0.028            | 0.087            | 0536          | 0.130            | 0.491            | >20              | >20              | >20        |
| 91C33    | 0167          | 0.875            | 2.592            | 0.346            | 0.801            | 0537          | 1.115            | 4.103            | >20              | >20              | < 0.5      |
| 91C34    | 0456          | 0.114            | 0.393            | 0.087            | 0.235            | 0541          | 1.855            | 6.025            | 0.148            | 0.412            | 0.5 - 1.0  |
| 91C35    | B315          | 1.018            | 3.382            | 0.037            | 0.097            | 0549          | 6.662            | 19.690           | 1.097            | 3.828            | 1.0 - 2.0  |
| 9341     | B450          | 1.059            | 3.679            | 1.244            | 4.445            | 0561          | 4.108            | 15.937           | 0.324            | 3.192            | 2.0 - 5.0  |
| 9342     | 0648          | 0.529            | 1.359            | 0.140            | 0.355            | 0615          | 0.295            | 0.799            | >20              | >20              | 5.0 - 20.0 |
| 9343     | 0787          | 0.125            | 0.567            | 0.058            | 0.191            | 0771          | >25              | >25              | >25              | >25              | 20         |
|          | 0034          | 1.341            | 3.704            | 0.029            | 0.069            | 0775          | 0.397            | 1.298            | 0.365            | 0.947            |            |
|          | 0039          | 5.238            | >20              | >20              | >20              | 0779          | >20              | >20              | >20              | >20              |            |
|          | 0277          | 1.066            | 2.592            | 5.652            | 13.627           | 0782          | >20              | >20              | 11.543           | >20              |            |
|          | 0338          | 0.125            | 0.385            | 0.044            | 0.130            | 0795          | >25              | >25              | >25              | >25              |            |
|          | 0355          | 4.192            | 13.086           | 0.097            | 0.214            | 0799          | 1.900            | 6.120            | 5.720            | 19.510           |            |
|          | 0359          | 1.036            | 3.807            | 4.903            | >20              | 0801          | 2.230            | 6.260            | >25              | >25              |            |
|          | 0403          | >20              | >20              | 0.900            | 3.598            | 0806          | >25              | >25              | 0.480            | 1.920            |            |
|          | 0422          | 0.318            | 1.070            | 0.003            | 0.008            | 0821          | 0.650            | 2.100            | 2.760            | 10.530           |            |
|          | 0423          | 0.987            | 3.306            | >20              | >20              | B270          | 0.720            | 2.791            | >20              | 0.043            |            |
|          | 0428          | 1.650            | 6.583            | 0.295            | 3.185            | B312          | >20              | >20              | 0.861            | 2.047            |            |
|          | 0438          | 0.761            | 3.165            | 0.016            | 0.060            | B331          | 1.531            | 7.140            | >20              | >20              |            |
|          | 0440          | 1.489            | 4.112            | >20              | >20              | B340          | 0.461            | 1.917            | >20              | >20              |            |
|          | 0464          | 0.313            | 1.099            | 8.282            | 20.000           | B367          | 2.073            | 6.230            | 1.870            | 6.582            |            |
|          | 0472          | 0.083            | 0.383            | 0.140            | 0.373            | B394          | 1.013            | 5.932            | 0.230            | 1.211            |            |
|          | 0473          | 0.530            | 1.861            | 0.025            | 0.076            | B407          | 0.044            | 0.193            | 0.017            | 0.057            |            |
|          | 0480          | 0.492            | 2.037            | 0.041            | 0.165            | B411          | 2.018            | 5.255            | 1.357            | 2.958            |            |
|          | 0508          | >20              | >20              | >20              | >20              | B434          | >20              | >20              | 0.454            | 1.431            |            |
|          | 0527          | >20              | >20              | >20              | >20              | B461          | 0.250            | 1.161            | 6.029            | 16.394           |            |
|          | 0535          | 0.334            | 0.989            | 0.187            | 0.704            | B465          | 0.325            | 2.481            | 0.305            | 1.712            |            |

**b** Pre-screening summary

| Antibody            | IC <sub>50</sub> <2 µg/ml |       |
|---------------------|---------------------------|-------|
|                     | n                         | %     |
| 3BNC117             | 35                        | 67.3% |
| 10-1074             | 30                        | 57.7% |
| 3BNC117 and 10-1074 | 21                        | 40.4% |

Table indicates IC<sub>50</sub>s and IC<sub>80</sub>s of 3BNC117 and 10-1074 against bulk CD4<sup>+</sup> T cell outgrowth culture-derived viruses obtained from viremic HIV-1-infected individuals. (a) Individual culture results. (b) Summary of all (n=52) tested cultures.

**Supplementary Table 2. Individual participant baseline demographics**

| Study ID | Dose / Regimen                 | Age (years) | Gender | Race                 | Years since HIV-1 diagnosis | ART at enrollment*      | HIV-1 Clade | HIV-1 RNA at day 0 (copies/ml) | CD4+ T cell count at day 0 (cells/μl) | Pre-Screen Sensitivity (μg/ml)** |       |         |       |
|----------|--------------------------------|-------------|--------|----------------------|-----------------------------|-------------------------|-------------|--------------------------------|---------------------------------------|----------------------------------|-------|---------|-------|
|          |                                |             |        |                      |                             |                         |             |                                |                                       | 3BNC117                          |       | 10-1074 |       |
|          |                                |             |        |                      |                             |                         |             |                                |                                       | IC50                             | IC80  | IC50    | IC80  |
| 1A12     | 10 mg/kg (ea.) day 0           | 53          | F      | American Indian/Hisp | 23                          | EFV, TDF, FTC           | n.d.        | <20                            | 809                                   |                                  | -     |         |       |
| 1A27     | 10 mg/kg (ea.) day 0           | 47          | M      | Black                | 16                          | RPV, TDF, FTC           | n.d.        | <20                            | 648                                   |                                  | -     |         |       |
| 1A29     | 10 mg/kg (ea.) day 0           | 45          | M      | Black                | 16                          | RPV, TDF, FTC           | n.d.        | <20                            | 558                                   |                                  | -     |         |       |
| 1A71     | 10 mg/kg (ea.) day 0           | 55          | M      | Black                | 10                          | EFV, TDF, FTC           | n.d.        | <20                            | 1,033                                 |                                  | -     |         |       |
| 1B05     | 30 mg/kg (ea.) day 0           | 34          | M      | Black                | 17                          | EFV, TDF, FTC           | n.d.        | <20                            | 711                                   |                                  | -     |         |       |
| 1B44     | 30 mg/kg (ea.) day 0           | 51          | M      | Black                | 18                          | ATV/r, TDF, FTC         | n.d.        | <20                            | 754                                   |                                  | -     |         |       |
| 1B55     | 30 mg/kg (ea.) day 0           | 56          | F      | Black                | 25                          | RAL, ETR, ABC, 3TC, ZDV | n.d.        | <20                            | 814                                   |                                  | -     |         |       |
| 1B61     | 30 mg/kg (ea.) day 0           | 64          | M      | Black                | 19                          | DTG, ABC, 3TC           | n.d.        | <20                            | 602                                   |                                  | -     |         |       |
| 91C22    | 30 mg/kg (ea.) day 0           | 58          | F      | Black                | 4                           | - (naïve)               | B           | 730                            | 586                                   | 0.084                            | 0.187 | 0.028   | 0.087 |
| 91C33    | 30 mg/kg (ea.) day 0           | 28          | M      | White                | 5                           | - (naïve)               | B           | 1,750                          | 750                                   | 0.875                            | 2.592 | 0.346   | 0.801 |
| 91C34    | 30 mg/kg (ea.) day 0           | 32          | M      | White                | 8                           | - (naïve)               | B           | 65,800                         | 520                                   | 0.114                            | 0.393 | 0.087   | 0.235 |
| 91C35    | 30 mg/kg (ea.) day 0           | 26          | M      | Mult/Hisp            | 4                           | - (experienced)†        | B           | 53,540                         | 320                                   | 1.018                            | 3.382 | 0.037   | 0.097 |
| 9341     | 30 mg/kg (ea.) day 0 - 14 - 28 | 48          | F      | Black                | 22                          | - (experienced)‡        | B           | 23,610                         | 682                                   | 1.059                            | 3.679 | 1.244   | 4.445 |
| 9342     | 30 mg/kg (ea.) day 0 - 14 - 28 | 41          | M      | White                | 15                          | - (naïve)               | B           | 2,550                          | 780                                   | 0.529                            | 1.359 | 0.140   | 0.355 |
| 9343     | 30 mg/kg (ea.) day 0 - 14 - 28 | 42          | M      | White                | 0.2                         | - (naïve)               | B           | 97,800                         | 350                                   | 0.125                            | 0.567 | 0.058   | 0.191 |

\* RPV - rilpivirine, TDF - tenofovir disoproxil fumarate, FTC - emtricitabine, EFV - efavirenz, ATV - atazanavir, /r - ritonavir-boosted, RAL - raltegravir, ETR - etravirine, ABC - abacavir, 3TC - lamivudine, ZDV - zidovudine.

\*\* Pre-screening of virus obtained from CD4+ T cell bulk outgrowth culture for antibody sensitivity by TZM-bl assay.

† 91C35 initiated ART (elvitegravir, cobicistat, TDF, FTC) within six months of presumed HIV-1 exposure. This regimen was maintained for four years until he chose to discontinue it. At the time of sensitivity screening and on the day of the first infusion, participant had been off ART for six and eight months, respectively.

‡ 9341 initiated ART within a year of diagnosis and was discontinued shortly thereafter. Since then, she had multiple periods of intermittent ART and reports receiving multiple different ART regimens. At the time of enrollment, she had been off ART for at least 12 months.

Table indicates baseline parameters of ART-treated and viremic study participants.

Supplementary Table 3. HIV-1 RNA levels, CD4<sup>+</sup> T cell counts and bNAb serum levels

| Viremic<br>Single infusion, day 0<br>3BNC117 + 10-1074 (30 mg/kg each i.v.) |           |                    |                          |      |          |          |          |          |                   |           |                    |                          |    |          |          |          |          |
|-----------------------------------------------------------------------------|-----------|--------------------|--------------------------|------|----------|----------|----------|----------|-------------------|-----------|--------------------|--------------------------|----|----------|----------|----------|----------|
| 91C22                                                                       | HIV-1 RNA |                    | CD4 <sup>+</sup> T cells |      | 3BNC117  |          | 10-1074  |          | 91C33             | HIV-1 RNA |                    | CD4 <sup>+</sup> T cells |    | 3BNC117  |          | 10-1074  |          |
|                                                                             | cp/ml     | Δlog <sub>10</sub> | cells/μl                 | %    | ELISA    | TZM-bi   | ELISA    | TZM-bi   |                   | cp/ml     | Δlog <sub>10</sub> | cells/μl                 | %  | ELISA    | TZM-bi   | ELISA    | TZM-bi   |
| Study visit                                                                 |           |                    |                          |      | Q769.d22 | Du422.1  | X2088_c9 | Du422.1  | Study visit       |           |                    |                          |    | Q769.d22 | X2088_c9 | Du422.1  | Du422.1  |
|                                                                             | cp/ml     | Δlog <sub>10</sub> | cells/μl                 | %    | μg/ml    |          |          |          |                   | cp/ml     | Δlog <sub>10</sub> | cells/μl                 | %  | μg/ml    |          |          |          |
| Screen                                                                      | 1,430     | -                  | 488                      | 21.0 | -        | -        | -        | -        | Screen            | 279       | -                  | 900                      | 20 | -        | -        | -        | -        |
| Wk -2 (+7d)                                                                 | 640       | -                  | 617                      | 20.0 | -        | -        | -        | -        | Wk -2 (+3)        | 421       | -                  | 800                      | 21 | -        | -        | -        | -        |
| Day 0 baseline                                                              | 730       | -                  | 586                      | 20.0 | <0.51    | <0.46    | <0.14    | <0.08    | Day 0 baseline    | 1,750     | -                  | 750                      | 25 | <0.51    | <0.46    | <0.14    | <0.10    |
| Day 0 end 3BNC117                                                           | -         | -                  | -                        | -    | 996.19   | 860.92   | <0.14    | <0.08    | Day 0 end 3BNC117 | -         | -                  | -                        | -  | 800.29   | 618.63   | <0.14    | <0.08    |
| Day 0 end 10-1074                                                           | -         | -                  | -                        | -    | 994.78   | 1,443.37 | 1,561.17 | 5,123.32 | Day 0 end 10-1074 | -         | -                  | -                        | -  | 473.37   | 1,307.44 | 1,321.43 | 1,917.72 |
| Day 2                                                                       | 720       | -0.01              | -                        | -    | 184.24   | 192.19   | 853.61   | 854.44   | Day 2 (+1d)       | 839       | -0.32              | -                        | -  | 155.27   | 165.99   | 695.70   | 455.56   |
| Wk 1                                                                        | <20       | -1.58*             | -                        | -    | 92.64    | 108.93   | 450.08   | 711.26   | Wk 1              | 575       | -0.48              | -                        | -  | 90.31    | 66.24    | 465.64   | 282.67   |
| Wk 2                                                                        | <20       | -1.58*             | 249                      | 17.8 | 29.05    | 32.06    | 152.75   | 140.71   | Wk 2              | 1,040     | -0.23              | 830                      | 20 | 47.33    | 48.02    | 189.58   | 171.74   |
| Wk 3                                                                        | <20D      | -1.58*             | -                        | -    | 14.92    | 12.21    | 103.63   | 60.15    | Wk 3              | 1,250     | -0.15              | -                        | -  | 30.09    | 63.23    | 180.44   | 113.08   |
| Wk 4                                                                        | <20       | -1.58*             | 456                      | 19.0 | 6.31     | 7.48     | 54.22    | 30.21    | Wk 4 (+3d)        | 699       | -0.40              | 690                      | 20 | 17.34    | 22.03    | 114.45   | 57.44    |
| Wk 6                                                                        | <20D      | -1.58*             | -                        | -    | 1.31     | 1.38     | 13.51    | 10.32    | Wk 6              | 961       | -0.26              | -                        | -  | 6.92     | 5.80     | 62.45    | 27.08    |
| Wk 8                                                                        | <20       | -1.58*             | 576                      | 24.0 | <0.51    | <0.46    | 8.31     | 3.34     | Wk 8              | 1,520     | -0.06              | 790                      | 18 | 2.12     | 1.36     | 27.61    | 11.14    |
| Wk 12 (-4d)                                                                 | 70        | -1.02              | 763                      | 24.6 | <0.51    | <0.46    | 1.50     | 0.69     | Wk 12 (-6d)       | 249       | -0.85              | 800                      | 19 | <0.51    | <0.46    | 14.12    | 3.46     |
| Wk 16                                                                       | 1,590     | 0.34               | 692                      | 24.7 | <0.51    | <0.46    | <0.14    | <0.1     | Wk 16 (-1d)       | 732       | -0.38              | 630                      | 21 | <0.51    | <0.46    | 2.18     | 0.63     |
| Wk 20 (+1d)                                                                 | 740       | 0.01               | 533                      | 20.5 | <0.51    | <0.46    | <0.14    | <0.1     | Wk 20 (+2d)       | 614       | -0.45              | 860                      | 20 | <0.51    | <0.46    | 0.58     | <0.1     |
| Wk 24 (+3d)                                                                 | 1,020     | 0.15               | 349                      | 16.6 | <0.51    | <0.46    | <0.14    | <0.1     | Wk 24 (+2d)       | 722       | -0.38              | 860                      | 23 | <0.51    | <0.28    | <0.14    | <0.08    |

  

| 91C34             | HIV-1 RNA |                    | CD4 <sup>+</sup> T cells |    | 3BNC117  |         | 10-1074  |          | 91C35             | HIV-1 RNA |                    | CD4 <sup>+</sup> T cells |      | 3BNC117  |          | 10-1074  |          |
|-------------------|-----------|--------------------|--------------------------|----|----------|---------|----------|----------|-------------------|-----------|--------------------|--------------------------|------|----------|----------|----------|----------|
|                   | cp/ml     | Δlog <sub>10</sub> | cells/μl                 | %  | ELISA    | TZM-bi  | ELISA    | TZM-bi   |                   | cp/ml     | Δlog <sub>10</sub> | cells/μl                 | %    | ELISA    | TZM-bi   | ELISA    | TZM-bi   |
| Study visit       |           |                    |                          |    | Q769.d22 | Du422.1 | X2088_c9 | Du422.1  | Study visit       |           |                    |                          |      | Q769.d22 | X2088_c9 | Du422.1  | Du422.1  |
|                   | cp/ml     | Δlog <sub>10</sub> | cells/μl                 | %  | μg/ml    |         |          |          |                   | cp/ml     | Δlog <sub>10</sub> | cells/μl                 | %    | μg/ml    |          |          |          |
| Screen            | 33,500    | -                  | 490                      | 36 | -        | -       | -        | -        | Screen            | 22,760    | -                  | 345                      | 27.0 | -        | -        | -        | -        |
| Wk -2 (+3)        | 33,900    | -                  | 500                      | 33 | -        | -       | -        | -        | Wk -2 (+7d)       | 15,120    | -                  | 382                      | 29.0 | -        | -        | -        | -        |
| Day 0 baseline    | 65,800    | -                  | 520                      | 36 | <0.51    | <0.46   | <0.14    | <0.1     | Day 0 baseline    | 53,540    | -                  | 320                      | 26.7 | <0.51    | <0.46    | <0.14    | <0.08    |
| Day 0 end 3BNC117 | -         | -                  | -                        | -  | 735.93   | 905.74  | <0.14    | <0.08    | Day 0 end 3BNC117 | -         | -                  | -                        | -    | 611.21   | 716.79   | <0.14    | <0.08    |
| Day 0 end 10-1074 | -         | -                  | -                        | -  | 665.80   | 945.12  | 889.07   | 1,242.07 | Day 0 end 10-1074 | -         | -                  | -                        | -    | 739.37   | 1,440.54 | 1,224.26 | 1,154.49 |
| Day 2             | 65,600    | 0.00               | -                        | -  | 180.98   | 447.79  | 723.69   | 613.03   | Day 2             | -         | -                  | -                        | -    | N/A      | N/A      | N/A      | N/A      |
| Wk 1 (+1d)        | 2,520     | -1.42              | -                        | -  | 104.13   | 164.31  | 365.53   | 270.02   | Wk 1              | 1,400     | -1.58              | -                        | -    | 94.36    | 82.52    | 385.14   | 265.15   |
| Wk 2 (+2d)        | 1,850     | -1.55              | 530                      | 36 | 56.59    | 50.85   | 258.52   | 200.97   | Wk 2              | 5,210     | -1.01              | 469                      | 27.6 | 42.87    | 41.12    | 253.06   | 172.42   |
| Wk 3 (-1d)        | 1,430     | -1.66              | -                        | -  | 41.00    | 55.96   | 208.91   | 181.26   | Wk 3 (+1d)        | 166,310   | 0.49               | -                        | -    | 23.93    | 33.70    | 168.68   | 107.55   |
| Wk 4              | 1,320     | -1.70              | 510                      | 34 | 23.04    | 88.32   | 182.26   | 85.10    | Wk 4              | 56,850    | 0.03               | 356                      | 25.4 | 16.62    | 31.86    | 127.75   | 63.31    |
| Wk 6 (-1d)        | 888       | -1.87              | -                        | -  | 12.68    | 46.87   | 105.43   | 43.24    | Wk 6              | 46,800    | -0.06              | -                        | -    | 6.42     | 5.47     | 51.06    | 29.46    |
| Wk 8              | 810       | -1.91              | 420                      | 35 | 5.68     | 5.01    | 84.27    | 29.26    | Wk 8 (+2d)        | 78,420    | 0.17               | 414                      | 28.0 | 2.56     | 2.23     | 23.98    | 8.13     |
| Wk 12 (+3d)       | 10,100    | -0.81              | 340                      | 41 | 1.56     | <0.46   | 55.46    | 5.51     | Wk 12             | 33,400    | -0.20              | 459                      | 35.3 | <0.51    | 1.59     | 7.43     | 2.62     |
| Wk 16             | 14,800    | -0.65              | 320                      | 36 | <0.51    | <0.46   | 3.52     | 1.16     | Wk 16             | N/A       | -                  | N/A                      | N/A  | N/A      | N/A      | N/A      | N/A      |
| Wk 20             | 14,100    | -0.67              | 400                      | 26 | <0.51    | <0.46   | 0.53     | <0.1     | Wk 20             | N/A       | -                  | N/A                      | N/A  | N/A      | N/A      | N/A      | N/A      |
| Wk 24             | 24,800    | -0.42              | 300                      | 33 | <0.51    | <0.28   | <0.14    | <0.08    | Wk 24             | N/A       | -                  | N/A                      | N/A  | N/A      | N/A      | N/A      | N/A      |

\* HIV-1 RNA < 20 copies/ml. For calculation of log-change, a value of 19 copies/ml was set.  
 < 20D: HIV-1 RNA detected but below limit of quantification.  
 Green shaded area indicates HIV-1 RNA nadir.  
 Grey shaded area indicates time on ART.

Table indicates clinical laboratory parameters and antibody serum concentrations as determined by ELISA and TZM-bi neutralization assay (using the indicated pseudoviruses) in viremic and ART-treated study participants.

Supplementary Table 3. HIV-1 RNA levels, CD4<sup>+</sup> T cell counts and bNAb serum levels (continued)

**Viremic**  
**Three infusions, day 0 / 14 / 28**  
**3BNC117 + 10-1074 (30 mg/kg each i.v.)**

| 9341               | HIV-1 RNA  |                   | CD4 <sup>+</sup> T cells |    | 3BNC117    |          | 10-1074  |          |
|--------------------|------------|-------------------|--------------------------|----|------------|----------|----------|----------|
|                    | cp/ml      | $\Delta\log_{10}$ | cells/ $\mu$ l           | %  | ELISA      | TZM-bl   | ELISA    | TZM-bl   |
|                    |            |                   |                          |    | Q769.d22   | Q769.d22 | X2088_c9 | Du422.1  |
| Study visit        | $\mu$ g/ml |                   | $\mu$ g/ml               |    | $\mu$ g/ml |          |          |          |
| Screen             | 43,760     | -                 | 570                      | 29 | -          | -        | -        | -        |
| Wk -2 (+2d)        | 47,430     | -                 | 834                      | 28 | -          | -        | -        | -        |
| Day 0 baseline     | 23,610     | -                 | 682                      | 28 | <0.51      | <0.46    | <0.14    | <0.10    |
| Day 0 end 3BNC117  | -          | -                 | -                        | -  | 591.87     | 691.29   | <0.14    | <0.08    |
| Day 0 end 10-1074  | -          | -                 | -                        | -  | 514.55     | 760.43   | 964.42   | 1,205.59 |
| Day 2 (-1d)        | 56,930     | 0.38              | -                        | -  | 175.43     | 184.83   | 1,172.69 | 705.70   |
| Week 1             | 3,670      | -0.81             | -                        | -  | 65.12      | 65.50    | 467.19   | 354.60   |
| Week 2             | 1,140      | -1.32             | 783                      | 26 | 28.08      | 34.29    | 230.89   | 142.84   |
| Week 2 End 3BNC117 | -          | -                 | -                        | -  | 605.54     | 522.54   | 251.10   | 69.74    |
| Week 2 End 10-1074 | -          | -                 | -                        | -  | 464.40     | 710.17   | 1,618.91 | 956.97   |
| Day 16 (-1d)       | 1,280      | -1.27             | -                        | -  | 206.52     | 192.74   | 1,134.66 | 802.17   |
| Week 3             | 1,970      | -1.08             | -                        | -  | 79.20      | 65.73    | 704.27   | 351.66   |
| Week 4 (+2d)       | 20,910     | -0.05             | 655                      | 27 | 25.90      | 37.38    | 272.58   | 161.28   |
| Week 4 End 3BNC117 | -          | -                 | -                        | -  | 778.41     | 662.16   | 238.07   | 87.72    |
| Week 4 End 10-1074 | -          | -                 | -                        | -  | 616.46     | 908.73   | 1,608.18 | 1,164.13 |
| Day 30 (+2d)       | 27,210     | 0.06              | -                        | -  | 158.75     | 176.71   | 1,085.61 | 686.97   |
| Week 5             | 33,530     | 0.15              | -                        | -  | 103.16     | 129.10   | 864.85   | 414.15   |
| Week 6 (+1d)       | 30,860     | 0.12              | 889                      | 34 | 41.43      | 92.51    | 372.33   | 208.83   |
| Week 7             | 41,480     | 0.24              | -                        | -  | 23.49      | 44.78    | 200.72   | 114.37   |
| Week 8 (+1d)       | 34,130     | 0.16              | -                        | -  | 12.36      | 15.36    | 132.56   | 66.99    |
| Week 10 (+1d)      | 43,670     | 0.27              | -                        | -  | 3.92       | 2.99     | 57.63    | 22.16    |
| Week 12            | 28,070     | 0.08              | 815                      | 29 | 1.17       | 1.47     | 29.98    | 9.12     |
| Week 16 (-5d)      | 41,270     | 0.24              | 525                      | 31 | <0.51      | 0.64     | 5.44     | 2.08     |
| Week 20            | 38,220     | 0.21              | 529                      | 25 | <0.51      | 0.48     | 1.48     | 0.42     |
| Week 28            | 38,300     | 0.21              | 707                      | 27 | <0.51      | <0.28    | <0.14    | <0.08    |

| 9342               | HIV-1 RNA  |                   | CD4 <sup>+</sup> T cells |    | 3BNC117    |          | 10-1074  |          |
|--------------------|------------|-------------------|--------------------------|----|------------|----------|----------|----------|
|                    | cp/ml      | $\Delta\log_{10}$ | cells/ $\mu$ l           | %  | ELISA      | TZM-bl   | ELISA    | TZM-bl   |
|                    |            |                   |                          |    | Q769.d22   | Q769.d22 | X2088_c9 | Du422.1  |
| Study visit        | $\mu$ g/ml |                   | $\mu$ g/ml               |    | $\mu$ g/ml |          |          |          |
| Screen             | 12,600     | -                 | 780                      | 37 | -          | -        | -        | -        |
| Wk -2 (+6d)        | 6,510      | -                 | 1,150                    | 39 | -          | -        | -        | -        |
| Day 0 baseline     | 2,550      | -                 | 780                      | 37 | <0.51      | <0.46    | <0.14    | <0.1     |
| Day 0 end 3BNC117  | -          | -                 | -                        | -  | 906.30     | 598.56   | <0.14    | <0.08    |
| Day 0 end 10-1074  | -          | -                 | -                        | -  | 640.24     | 1,387.82 | 1,899.04 | 991.55   |
| Day 2 (+1d)        | 3,650      | 0.16              | -                        | -  | 150.29     | 157.32   | 1,070.88 | 383.33   |
| Week 1             | 331        | -0.89             | -                        | -  | 95.67      | 99.11    | 709.76   | 350.58   |
| Week 2             | 39         | -1.82             | 1,040                    | 39 | 51.07      | 143.38   | 377.23   | 115.40   |
| Week 2 End 3BNC117 | -          | -                 | -                        | -  | 822.47     | 1,187.98 | 378.85   | 192.30   |
| Week 2 End 10-1074 | -          | -                 | -                        | -  | 685.45     | 1,524.62 | 1,859.48 | 648.58   |
| Day 16 (+1d)       | 61         | -1.62             | -                        | -  | 197.35     | 248.52   | 1,357.52 | 500.25   |
| Week 3             | 45         | -1.75             | -                        | -  | 109.53     | 141.15   | 836.22   | 364.62   |
| Week 4             | 25         | -2.01             | 1,140                    | 41 | 66.94      | 59.73    | 555.68   | 255.74   |
| Week 4 End 3BNC117 | -          | -                 | -                        | -  | 907.46     | 612.74   | 570.14   | 346.48   |
| Week 4 End 10-1074 | -          | -                 | -                        | -  | 751.33     | 1,604.27 | 2,281.04 | 3,298.12 |
| Day 30 (+1d)       | 55         | -1.67             | -                        | -  | 212.77     | 396.80   | 1,456.90 | 1,948.69 |
| Week 5             | <20 D      | -2.13*            | -                        | -  | 119.35     | 145.15   | 906.38   | 666.54   |
| Week 6             | 24         | -2.03             | 870                      | 39 | 76.63      | 148.56   | 454.16   | 499.36   |
| Week 7             | <20 D      | -2.13*            | -                        | -  | 47.02      | 91.86    | 393.01   | 400.05   |
| Week 8             | 24         | -2.03             | -                        | -  | 32.11      | 29.37    | 323.64   | 285.06   |
| Week 10            | 32         | -1.90             | -                        | -  | 15.28      | 15.71    | 197.13   | 87.75    |
| Week 12            | <20        | -2.13*            | 800                      | 39 | 7.61       | 3.25     | 130.64   | 56.27    |
| Week 16            | 55         | -1.67             | 900                      | 44 | 4.86       | <0.462   | 30.80    | 6.13     |
| Week 20            | 645        | -0.60             | 1,066                    | 41 | <0.78      | <0.28    | 8.86     | 1.60     |
| Week 28 (-1d)      | 3,780      | 0.17              | 900                      | 40 | <0.51      | <0.26    | <0.41    | <0.08    |

| 9343               | HIV-1 RNA  |                   | CD4 <sup>+</sup> T cells |    | 3BNC117    |          | 10-1074  |          |
|--------------------|------------|-------------------|--------------------------|----|------------|----------|----------|----------|
|                    | cp/ml      | $\Delta\log_{10}$ | cells/ $\mu$ l           | %  | ELISA      | TZM-bl   | ELISA    | TZM-bl   |
|                    |            |                   |                          |    | Q769.d22   | Q769.d22 | X2088_c9 | Du422.1  |
| Study visit        | $\mu$ g/ml |                   | $\mu$ g/ml               |    | $\mu$ g/ml |          |          |          |
| Screen             | 95,400     | -                 | 410                      | 34 | -          | -        | -        | -        |
| Wk -2 (+5d)        | 91,000     | -                 | 380                      | 35 | -          | -        | -        | -        |
| Day 0 baseline     | 97,800     | -                 | 350                      | 39 | <0.51      | <0.46    | <0.14    | <0.1     |
| Day 0 end 3BNC117  | -          | -                 | -                        | -  | 708.31     | 704.45   | <0.14    | <0.08    |
| Day 0 end 10-1074  | -          | -                 | -                        | -  | 646.99     | 1,302.26 | 1,854.69 | 1,948.61 |
| Day 2              | 60,100     | -0.21             | -                        | -  | 140.54     | 270.87   | 852.16   | 705.63   |
| Week 1             | 1,880      | -1.72             | -                        | -  | 89.38      | 106.08   | 546.67   | 632.45   |
| Week 2 (-2d)       | 1,200      | -1.91             | 400                      | 40 | 51.85      | 61.30    | 352.90   | 256.46   |
| Week 2 End 3BNC117 | -          | -                 | -                        | -  | 723.18     | 524.50   | 436.11   | 168.51   |
| Week 2 End 10-1074 | -          | -                 | -                        | -  | 644.86     | 1,457.60 | 1,639.91 | 1,511.34 |
| Day 16 (-2d)       | 808        | -2.08             | -                        | -  | 185.87     | 398.94   | 1,271.33 | 771.96   |
| Week 3 (-3d)       | 359        | -2.44             | -                        | -  | 118.57     | 189.64   | 944.48   | 878.39   |
| Week 4 (+1d)       | 335        | -2.47             | 350                      | 39 | 61.31      | 70.56    | 487.90   | 257.37   |
| Week 4 End 3BNC117 | -          | -                 | -                        | -  | 898.03     | 689.28   | 478.73   | 285.73   |
| Week 4 End 10-1074 | -          | -                 | -                        | -  | 556.75     | 1,976.30 | 2,051.36 | 1,486.18 |
| Day 30             | 373        | -2.42             | -                        | -  | 215.08     | 786.85   | 1,398.07 | 2,797.41 |
| Week 5             | 265        | -2.57             | -                        | -  | 134.37     | 97.78    | 1,008.78 | 531.42   |
| Week 6             | 660        | -2.17             | 520                      | 39 | 112.40     | 51.56    | 677.90   | 235.62   |
| Week 7             | 3,660      | -1.43             | -                        | -  | 72.81      | 19.32    | 467.60   | 159.35   |
| Week 8 (-1d)       | 12,000     | -0.91             | -                        | -  | 55.72      | 23.49    | 305.69   | 151.33   |
| Week 10 (+1d)      | 22         | -                 | -                        | -  | 20.52      | 15.88    | 223.08   | 59.75    |
| Week 12            | <20D       | -                 | 370                      | 40 | 10.84      | 4.94     | 107.82   | 37.16    |
| Week 16            | <20        | -                 | 444                      | 39 | 4.64       | 1.16     | 51.12    | 7.88     |
| Week 20            | <20        | -                 | 430                      | 38 | 0.82       | <0.26    | 13.67    | 2.59     |
| Week 28            | <20        | -                 | 350                      | 35 | <0.51      | <0.26    | 2.36     | 0.62     |

\* HIV-1 RNA < 20 copies/ml. For calculation of log-change, a value of 19 copies/ml was set.  
 < 20D: HIV-1 RNA detected but below limit of quantification.  
 Green shaded area indicates HIV-1 RNA nadir.  
 Grey shaded area indicates time on ART.

Supplementary Table 3. HIV-1 RNA levels, CD4<sup>+</sup> T cell counts and bNAbs serum levels (continued)

**On ART**  
**Single infusion, day 0**  
**3BNC117 + 10-1074 (10 mg/kg each i.v.)**

| 1A12                 | HIV-1 RNA | CD4 <sup>+</sup> T cells |      | 3BNC117  |          | 10-1074  |         |
|----------------------|-----------|--------------------------|------|----------|----------|----------|---------|
|                      |           |                          |      | ELISA    | TZM-bl   | ELISA    | TZM-bl  |
|                      |           |                          |      | Q769.d22 | Q769.d22 | X2088_c9 | Du422.1 |
| Study visit          | cp/ml     | cells/μl                 | %    | μg/ml    |          |          |         |
| Screen               | <20       | 505                      | 42.0 | -        | -        | -        | -       |
| Wk -2 (pre-infusion) | <20       | 556                      | 43.0 | -        | -        | -        | -       |
| Day 0 baseline       | <20       | 558                      | 42.9 | <0.51    | <0.88    | 0.43*    | <0.22   |
| Day 0 end 3BNC117    | -         | -                        | -    | 306.43   | 253.08   | <0.41    | <0.27   |
| Day 0 end 10-1074    | -         | -                        | -    | 260.33   | 192.17   | 474.87*  | 281.05  |
| Day 2                | <20       | -                        | -    | 74.25    | 59.90    | 323.39*  | 205.32  |
| Wk 1                 | <20       | -                        | -    | 33.12    | 18.00    | 191.53*  | 102.06  |
| Wk 2                 | <20       | 691                      | 43.2 | 20.35    | 12.33    | 139.84*  | 48.48   |
| Wk 3                 | <20       | -                        | -    | 14.01    | 9.02     | 91.62*   | 47.17   |
| Wk 4                 | <20       | 558                      | 42.9 | 10.20    | 5.44     | 65.02*   | 21.68   |
| Wk 6                 | <20       | -                        | -    | 4.39     | 3.01     | 40.93*   | 17.25   |
| Wk 8                 | <20       | 440                      | 44.0 | 2.38     | 1.22     | 18.04*   | 7.45    |
| Wk 12                | <20       | 534                      | 44.5 | 0.88     | <0.91    | 6.93*    | 1.48    |
| Wk 16                | <20       | 566                      | 43.5 | <0.51    | <0.91    | bkg*     | <0.25   |
| Wk 20                | <20       | 639                      | 42.6 | <0.51    | <0.91    | bkg*     | <0.25   |
| Wk 24                | <20       | 538                      | 44.8 | <0.51    | <0.91    | <0.41    | <0.25   |

| 1A27                 | HIV-1 RNA | CD4 <sup>+</sup> T cells |      | 3BNC117  |          | 10-1074  |         |
|----------------------|-----------|--------------------------|------|----------|----------|----------|---------|
|                      |           |                          |      | ELISA    | TZM-bl   | ELISA    | TZM-bl  |
|                      |           |                          |      | Q769.d22 | Q769.d22 | X2088_c9 | Du422.1 |
| Study Visit          | cp/ml     | cells/μl                 | %    | μg/ml    |          |          |         |
| Screen               | <20       | 780                      | 39.0 | -        | -        | -        | -       |
| Wk -2 (pre-infusion) | <20       | 967                      | 40.3 | -        | -        | -        | -       |
| Day 0 baseline       | <20       | 1,033                    | 39.8 | 1.17*    | <0.88    | <0.14    | <0.22   |
| Day 0 end 3BNC117    | -         | -                        | -    | 197.25*  | 199.52   | <0.14    | <0.27   |
| Day 0 end 10-1074    | -         | -                        | -    | 127.91*  | 84.55    | 217.43   | 179.35  |
| Day 2                | <20D      | -                        | -    | 39.51*   | 29.84    | 151.20   | 126.12  |
| Wk 1                 | <20       | -                        | -    | 22.15*   | 14.05    | 97.38    | 68.12   |
| Wk 2                 | <20       | 971                      | 42.2 | 15.60*   | 7.89     | 76.31    | 38.78   |
| Wk 3                 | <20       | -                        | -    | 8.48*    | 5.79     | 46.90    | 29.10   |
| Wk 4                 | <20       | 1,210                    | 43.0 | 5.54*    | 2.77     | 31.86    | 18.99   |
| Wk 6                 | <20       | -                        | -    | bkg*     | <1.11    | 20.08    | 11.10   |
| Wk 8                 | <20       | 844                      | 40.2 | bkg*     | <0.91    | 11.62    | 2.87    |
| Wk 12                | <20       | 1,350                    | 42.2 | bkg*     | <0.91    | 3.82     | 1.23    |
| Wk 16                | 30        | 1,405                    | 43.9 | bkg*     | <0.91    | 1.10     | 0.53    |
| Wk 20                | <20       | 1,592                    | 41.9 | bkg*     | <0.91    | 0.54     | <0.25   |
| Wk 24                | <20       | 1,229                    | 45.5 | <0.51    | <0.91    | <0.14    | <0.25   |

| 1A29                 | HIV-1 RNA | CD4 <sup>+</sup> T cells |      | 3BNC117  |          | 10-1074  |         |
|----------------------|-----------|--------------------------|------|----------|----------|----------|---------|
|                      |           |                          |      | ELISA    | TZM-bl   | ELISA    | TZM-bl  |
|                      |           |                          |      | Q769.d22 | Q769.d22 | X2088_c9 | Du422.1 |
| Study Visit          | cp/ml     | cells/μl                 | %    | μg/ml    |          |          |         |
| Screen               | <20       | 516                      | 32.4 | -        | -        | -        | -       |
| Wk -2 (pre-infusion) | <20       | 388                      | 35.3 | -        | -        | -        | -       |
| Day 0 baseline       | <20       | 648                      | 36.0 | <0.51    | <0.88    | <0.14    | <0.22   |
| Day 0 end 3BNC117    | -         | -                        | -    | 228.08   | 184.64   | <0.14    | <0.28   |
| Day 0 end 10-1074    | -         | -                        | -    | 187.44   | 127.30   | 326.19   | 246.88  |
| Day 2                | <20       | -                        | -    | 39.82    | 32.06    | 140.18   | 109.65  |
| Wk 1                 | <20       | -                        | -    | 26.01    | 12.10    | 116.08   | 59.57   |
| Wk 2                 | <20       | 794                      | 36.1 | 17.91    | 8.79     | 93.34    | 56.12   |
| Wk 3                 | <20       | -                        | -    | 12.67    | 9.52     | 63.90    | 47.62   |
| Wk 4                 | <20       | 741                      | 34.0 | 8.55     | 4.71     | 41.98    | 22.84   |
| Wk 6                 | <20       | -                        | -    | 5.55     | 2.51     | 31.46    | 15.91   |
| Wk 8                 | <20       | 596                      | 33.1 | 2.71     | 1.22     | 18.52    | 8.87    |
| Wk 12                | <20       | 667                      | 35.1 | 1.02     | <0.91    | 14.89    | 4.16    |
| Wk 16                | <20       | 676                      | 35.6 | <0.51    | <0.91    | 4.64     | 1.64    |
| Wk 20                | <20       | 892                      | 34.3 | <0.51    | <0.91    | 1.91     | 0.74    |
| Wk 24                | <20D      | 956                      | 35.4 | <0.51    | <0.91    | 0.99     | 0.39    |

| 1A71                 | HIV-1 RNA | CD4 <sup>+</sup> T cells |      | 3BNC117  |          | 10-1074  |         |
|----------------------|-----------|--------------------------|------|----------|----------|----------|---------|
|                      |           |                          |      | ELISA    | TZM-bl   | ELISA    | TZM-bl  |
|                      |           |                          |      | Q769.d22 | Q769.d22 | X2088_c9 | Du422.1 |
| Study Visit          | cp/ml     | cells/μl                 | %    | μg/ml    |          |          |         |
| Screen               | <20       | 478                      | 36.8 | -        | -        | -        | -       |
| Wk -2 (pre-infusion) | <20       | 552                      | 34.5 | -        | -        | -        | -       |
| Day 0 baseline       | <20       | 358                      | 35.8 | <0.51    | <0.88    | <0.14    | <0.22   |
| Day 0 end 3BNC117    | -         | -                        | -    | 169.68   | 164.67   | <0.14    | <0.28   |
| Day 0 end 10-1074    | -         | -                        | -    | 117.29   | 89.49    | 382.39   | 201.53  |
| Day 2                | <20       | -                        | -    | 49.08    | 34.85    | 270.88   | 166.39  |
| Wk 1                 | <20       | -                        | -    | 24.48    | 14.14    | 164.63   | 56.31   |
| Wk 2                 | <20       | 461                      | 38.0 | 16.12    | 9.47     | 138.58   | 44.15   |
| Wk 3                 | <20       | -                        | -    | 12.11    | 8.02     | 102.34   | 30.65   |
| Wk 4                 | <20       | 650                      | 43.3 | 7.11     | 3.08     | 62.63    | 18.28   |
| Wk 6                 | <20       | -                        | -    | 5.91     | 1.95     | 46.15    | 15.37   |
| Wk 8                 | <20       | 418                      | 38.0 | 2.81     | <0.91    | 28.89    | 7.23    |
| Wk 12                | <20       | 467                      | 38.9 | 1.38     | <0.91    | 10.95    | 3.24    |
| Wk 16                | <20D      | 458                      | 41.6 | <0.51    | <0.91    | 4.58     | 1.34    |
| Wk 20                | <20       | 458                      | 38.2 | <0.51    | <0.91    | 1.89     | 0.52    |
| Wk 24                | <20       | 429                      | 39.0 | <0.51    | <0.91    | 0.66     | <0.25   |

\* Number in red indicates background levels detected by ELISA at baseline that are subtracted from all subsequent values.  
 bkg indicates time points with a detectable signal within a 3-fold range of the baseline background level.  
 < 20D: HIV-1 RNA detected but below limit of quantification.  
 Grey shaded area indicates time on ART.

Supplementary Table 3. HIV-1 RNA levels, CD4<sup>+</sup> T cell counts and bNAb serum levels (continued)

**On ART**  
**Single infusion, day 0**  
**3BNC117 + 10-1074 (30 mg/kg each i.v.)**

| 1B05                  | HIV-1 RNA | CD4 <sup>+</sup> T cells |      | 3BNC117  |          | 10-1074            |                 |
|-----------------------|-----------|--------------------------|------|----------|----------|--------------------|-----------------|
|                       |           |                          |      | ELISA    | TZM-bl   | ELISA              | TZM-bl          |
|                       |           |                          |      | Q769.d22 |          | X2088_c9   Du422.1 |                 |
| Study Visit           | cp/ml     | cells/μl                 | %    | μg/ml    |          | μg/ml              |                 |
| Screen                | <20       | 830                      | 35.0 | -        | -        | -                  | -               |
| Wk -2 (pre-infusion)  | <20       | 843                      | 34.0 | -        | -        | -                  | -               |
| <b>Day 0 baseline</b> | <20       | 711                      | 37.4 | <0.51    | <0.88    | <0.14              | <0.22           |
| Day 0 end 3BNC117     | -         | -                        | -    | 1,298.73 | 1,045.69 | <0.14              | <0.28           |
| Day 0 end 10-1074     | -         | -                        | -    | 481.98   | 323.18   | 915.08             | 952.08   500.20 |
| Day 2                 | <20       | -                        | -    | 281.88   | 208.81   | 1,486.91           | 781.03          |
| Wk 1                  | <20       | -                        | -    | 147.17   | 47.28    | 663.37             | 396.49          |
| Wk 2                  | <20       | 830                      | 34.6 | 118.27   | 41.48    | 557.30             | 258.98          |
| Wk 3                  | <20       | -                        | -    | 61.36    | 37.63    | 354.79             | 147.58          |
| Wk 4                  | <20       | 963                      | 34.4 | 40.15    | 14.82    | 210.45             | 82.94           |
| Wk 6                  | <20       | -                        | -    | 21.00    | 10.58    | 120.48             | 60.10           |
| Wk 8                  | <20       | 727                      | 34.6 | 10.28    | 5.30     | 72.39              | 26.64           |
| Wk 12                 | 30        | 854                      | 35.6 | 3.01     | 0.95     | 29.58              | 5.72            |
| Wk 16                 | <20       | 865                      | 34.6 | 1.00     | <0.91    | 7.91               | 1.23            |
| Wk 20                 | <20D      | 902                      | 35.0 | <0.51    | <0.91    | 2.05               | 0.30            |
| Wk 24                 | <20D      | 966                      | 34.5 | <0.51    | <0.91    | 0.62               | <0.25           |

| 1B44                  | HIV-1 RNA | CD4 <sup>+</sup> T cells |      | 3BNC117  |        | 10-1074            |                   |
|-----------------------|-----------|--------------------------|------|----------|--------|--------------------|-------------------|
|                       |           |                          |      | ELISA    | TZM-bl | ELISA              | TZM-bl            |
|                       |           |                          |      | Q769.d22 |        | X2088_c9   Du422.1 |                   |
| Study Visit           | cp/ml     | cells/μl                 | %    | μg/ml    |        | μg/ml              |                   |
| Screen                | <20D      | 625                      | 28.0 | -        | -      | -                  | -                 |
| Wk -2 (pre-infusion)  | <20D      | 432                      | 27.0 | -        | -      | -                  | -                 |
| <b>Day 0 baseline</b> | <20       | 754                      | 31.4 | <0.51    | <0.88  | <0.14              | <0.22             |
| Day 0 end 3BNC117     | -         | -                        | -    | 1,062.42 | 791.00 | <0.14              | <0.28             |
| Day 0 end 10-1074     | -         | -                        | -    | 837.40   | 532.67 | 1,107.92           | 2,189.62   613.42 |
| Day 2                 | <20       | -                        | -    | 228.66   | 242.26 | 807.98             | 914.41            |
| Wk 1                  | <20D      | -                        | -    | 100.12   | 45.24  | 367.80             | 412.46            |
| Wk 2                  | 30        | 653                      | 27.2 | 44.02    | 30.24  | 209.61             | 150.12            |
| Wk 3                  | <20       | -                        | -    | 27.16    | 12.69  | 149.04             | 65.75             |
| Wk 4                  | <20       | 737                      | 27.3 | 13.66    | 7.03   | 91.36              | 48.47             |
| Wk 6                  | 60        | -                        | -    | 5.87     | 1.95   | 42.68              | 15.71             |
| Wk 8                  | 60        | 620                      | 29.5 | 1.97     | <0.91  | 17.87              | 4.13              |
| Wk 12                 | 20        | 511                      | 28.4 | <0.51    | <0.91  | 4.75               | 1.09              |
| Wk 16                 | <20D      | 637                      | 27.7 | <0.51    | <0.91  | 2.07               | 0.57              |
| Wk 20                 | <20D      | 647                      | 30.8 | <0.51    | <0.91  | <0.41              | <0.25             |
| Wk 24                 | <20D      | 592                      | 29.6 | <0.51    | <0.91  | <0.14              | <0.25             |

| 1B55                  | HIV-1 RNA | CD4 <sup>+</sup> T cells |      | 3BNC117  |        | 10-1074            |                   |
|-----------------------|-----------|--------------------------|------|----------|--------|--------------------|-------------------|
|                       |           |                          |      | ELISA    | TZM-bl | ELISA              | TZM-bl            |
|                       |           |                          |      | Q769.d22 |        | X2088_c9   Du422.1 |                   |
| Study Visit           | cp/ml     | cells/μl                 | %    | μg/ml    |        | μg/ml              |                   |
| Screen                | <20       | 575                      | 34.0 | -        | -      | -                  | -                 |
| Wk -2 (pre-infusion)  | <20D      | 763                      | 35.0 | -        | -      | -                  | -                 |
| <b>Day 0 baseline</b> | <20       | 634                      | 37.3 | 2.68*    | <0.88  | <0.14              | <0.22             |
| Day 0 end 3BNC117     | -         | -                        | -    | 1282.13* | 955.36 | <0.14              | <0.28             |
| Day 0 end 10-1074     | -         | -                        | -    | 1316.73* | 775.93 | 1,110.10           | 1,070.39   954.18 |
| Day 2                 | <20       | -                        | -    | 199.22*  | 154.53 | 688.89             | 645.71            |
| Wk 1                  | <20       | -                        | -    | 140.52*  | 61.74  | 488.65             | 327.15            |
| Wk 2                  | <20       | 409                      | 34.1 | 80.01*   | 31.14  | 318.25             | 179.07            |
| Wk 3                  | <20       | -                        | -    | 51.36*   | 28.72  | 221.56             | 142.75            |
| Wk 4                  | <20       | 560                      | 35.0 | 31.38*   | 10.52  | 171.94             | 80.41             |
| Wk 6                  | <20       | -                        | -    | 17.93*   | 7.29   | 102.91             | 47.29             |
| Wk 8                  | <20       | 680                      | 37.8 | 10.06*   | 3.22   | 57.89              | 24.78             |
| Wk 12                 | <20       | 707                      | 39.3 | bkg*     | ND     | 22.65              | ND                |
| Wk 16                 | <20       | 760                      | 38.0 | bkg*     | <0.91  | 8.14               | 2.15              |
| Wk 20                 | <20       | 425                      | 35.4 | bkg*     | <0.91  | 3.03               | 0.79              |
| Wk 24                 | <20       | 905                      | 43.1 | bkg*     | ND     | 1.25               | ND                |

| 1B61                  | HIV-1 RNA | CD4 <sup>+</sup> T cells |      | 3BNC117  |        | 10-1074            |                 |
|-----------------------|-----------|--------------------------|------|----------|--------|--------------------|-----------------|
|                       |           |                          |      | ELISA    | TZM-bl | ELISA              | TZM-bl          |
|                       |           |                          |      | Q769.d22 |        | X2088_c9   Du422.1 |                 |
| Study Visit           | cp/ml     | cells/μl                 | %    | μg/ml    |        | μg/ml              |                 |
| Screen                | <20D      | 449                      | 34.5 | -        | -      | -                  | -               |
| Wk -2 (pre-infusion)  | <20D      | 619                      | 32.6 | -        | -      | -                  | -               |
| <b>Day 0 baseline</b> | <20       | 602                      | 35.4 | <0.51    | <0.88  | <0.14              | <0.22           |
| Day 0 end 3BNC117     | -         | -                        | -    | 987.11   | 754.17 | <0.14              | <0.28           |
| Day 0 end 10-1074     | -         | -                        | -    | 653.74   | 707.29 | 984.32             | 713.26   456.89 |
| Day 2                 | <20       | -                        | -    | 182.35   | 149.24 | 706.38             | 709.00          |
| Wk 1                  | <20       | -                        | -    | 96.75    | 66.41  | 402.61             | 336.79          |
| Wk 2                  | <20       | 285                      | 28.5 | 69.99    | 25.70  | 284.87             | 178.69          |
| Wk 3                  | <20       | -                        | -    | 46.82    | 26.44  | 204.69             | 115.93          |
| Wk 4                  | <20       | 686                      | 36.1 | 28.47    | 13.46  | 156.18             | 64.06           |
| Wk 6                  | <20       | -                        | -    | 20.73    | 9.13   | 110.30             | 47.55           |
| Wk 8                  | <20       | 492                      | 32.8 | 8.08     | 2.99   | 70.46              | 27.80           |
| Wk 12                 | 30        | 679                      | 37.7 | 1.27     | <0.91  | 34.42              | 12.78           |
| Wk 16                 | <20D      | 566                      | 35.4 | <0.51    | <0.91  | 16.65              | 3.97            |
| Wk 20                 | <20       | 515                      | 34.3 | <0.51    | <0.91  | 6.20               | 1.27            |
| Wk 24                 | <20       | 675                      | 35.5 | <0.51    | <0.91  | 2.52               | 0.93            |

\* Number in red indicates background levels detected by ELISA at baseline that are subtracted from all subsequent values.

bkg indicates time points with a detectable signal within a 3-fold range of the baseline background level.

< 20D: HIV-1 RNA detected but below limit of quantification.

Grey shaded area indicates time on ART.

ND: Not determined because of detectable activity (ID<sub>50</sub> > 20) against MuLV negative control.



**Supplementary Table 4. Adverse events reported during study follow-up**

| Adverse Event (AE)                      | AEs<br>(no.) | Severity Grade |                   |                 | Participants of n=15<br>(no.) |
|-----------------------------------------|--------------|----------------|-------------------|-----------------|-------------------------------|
|                                         |              | Mild<br>(no.)  | Moderate<br>(no.) | Severe<br>(no.) |                               |
| <b>Related to 3BNC117 + 10-1074</b>     |              |                |                   |                 |                               |
| Nausea                                  | 1            | 1              | 0                 | 0               | 1                             |
| Transaminitis                           | 1            | 1              | 0                 | 0               | 1                             |
| Upper respiratory tract infection       | 1            | 1              | 0                 | 0               | 1                             |
| <b>Total related</b>                    | <b>3</b>     | <b>3</b>       | <b>0</b>          | <b>0</b>        | <b>3</b>                      |
| <b>Not related to 3BNC117 + 10-1074</b> |              |                |                   |                 |                               |
| Gonorrhea                               | 2            | 0              | 2                 | 0               | 2                             |
| Upper respiratory tract infection       | 2            | 1              | 0                 | 0               | 2                             |
| Abdominal distension                    | 1            | 1              | 0                 | 0               | 1                             |
| Agitation                               | 1            | 1              | 0                 | 0               | 1                             |
| Altered mental status*                  | 1            | 0              | 0                 | 1               | 1                             |
| Common cold                             | 1            | 1              | 0                 | 0               | 1                             |
| Headache                                | 1            | 1              | 0                 | 0               | 1                             |
| Hypoglycemia                            | 1            | 1              | 0                 | 0               | 1                             |
| Increase in direct bilirubin**          | 1            | n/a            | n/a               | 2               | 1                             |
| Mycoplasma urethritis                   | 1            | 0              | 1                 | 0               | 1                             |
| Sore throat                             | 1            | 1              | 0                 | 0               | 1                             |
| Vomiting                                | 1            | 0              | 1                 | 0               | 1                             |
| Worsening of tinea pedis                | 1            | 0              | 1                 | 0               | 1                             |
| <b>Total Not related</b>                | <b>15</b>    | <b>7</b>       | <b>5</b>          | <b>3</b>        | <b>6</b>                      |
| <b>Total</b>                            | <b>18</b>    | <b>10</b>      | <b>5</b>          | <b>3</b>        | <b>9</b>                      |

\* One participant experienced altered mental status due to drug intoxication with gamma-hydroxybutyric acid (GHB).

\*\* One participant noted to have transient elevation to 0.3 mg/dL one week after first mAb infusions, and 0.4 mg/dL 24 weeks after last mAb infusions. These were graded as severe according to the DAIDS Toxicity table (version 2.0)

Table indicates adverse events observed during the study observation period (24 weeks after the last antibody infusion) in the 15 enrolled participants. Adverse events were graded according to the Division of AIDS (DAIDS) Table for Grading the Severity of Adult and Pediatric Adverse Events (version 2.0).

**Supplementary Table 5. Pharmacokinetics of 3BNC117 and 10-1074**

**a Summary**

| Antibody        | ART         | Dose     | Regimen    | Method (n)   | $t_{1/2}$ (days)* |           |           | AUC <sub>last</sub> ( $\mu\text{g} \times \text{h/ml}$ ) |                   |                   | C <sub>max</sub> ( $\mu\text{g/ml}$ ) |               |                 |
|-----------------|-------------|----------|------------|--------------|-------------------|-----------|-----------|----------------------------------------------------------|-------------------|-------------------|---------------------------------------|---------------|-----------------|
|                 |             |          |            |              | Mean              | SD        | Range     | Mean                                                     | SD                | Range             | Mean                                  | SD            | Range           |
| 3BNC117         | Off         | 30 mg/kg | wk 0       | ELISA (4)    | 10.1              | 3.9       | 6.0-15.1  | 3,155.5                                                  | 667.7             | 2,612.5-4,039.2   | 817.9                                 | 122.5         | 735.9-996.2     |
|                 |             |          |            | TZM-bl (4)   | 7.9               | 3.0       | 6.3-12.5  | 5,022.7                                                  | 1,650.6           | 3,183.3-6,643.2   | 1,284.1                               | 234.7         | 945.1-1,443.4   |
|                 | Off         | 30 mg/kg | wk 0-2-4   | ELISA (3)    | 12.3              | 4.1       | 8.1-16.2  | 7,226.3                                                  | 1,833.3           | 5,331.7-8,991.5   | 861.3                                 | 71.9          | 778.4-907.5     |
|                 |             |          |            | TZM-bl (2)** | 9.6               | 2.5       | 7.8-11.4  | 10,603.8                                                 | 5,705.9           | 6,568.4-14,637.8  | 1,256.6                               | 491.8         | 908.7-1,604.3   |
|                 | All viremic | 30 mg/kg |            | ELISA (7)    | 11.1              | 3.8       | 6.0-16.2  |                                                          |                   |                   |                                       |               |                 |
|                 |             |          |            | TZM-bl (6)** | 8.5               | 2.8       | 6.3-12.5  |                                                          |                   |                   |                                       |               |                 |
|                 | On          | 10 mg/kg | wk0        | ELISA (4)    | 16.4              | 4.3       | 10.2-19.8 | 923.2                                                    | 262.6             | 579.0-1,197.2     | 225.4                                 | 59.1          | 169.7-306.4     |
| TZM-bl (4)      |             |          |            | 12.1         | 2.1               | 9.4-14.4  | 562.0     | 167.9                                                    | 387.2-775.0       | 200.5             | 37.9                                  | 164.7-253.1   |                 |
| On              | 30 mg/kg    | wk0      | ELISA (4)  | 12.5         | 3.3               | 9.4-16.7  | 3,971.3   | 969.9                                                    | 2,817.1-4,878.8   | 1,166.2           | 166.4                                 | 987.1-1,316.7 |                 |
|                 |             |          | TZM-bl (4) | 10.9         | 2.1               | 7.7-12.0  | 2,353.6   | 318.5                                                    | 1976.2-2754.5     | 886.6             | 137.5                                 | 754.2-1,045.7 |                 |
| All ART-treated |             |          | ELISA (8)  | 14.5         | 4.1               | 9.4-19.8  |           |                                                          |                   |                   |                                       |               |                 |
|                 |             |          | TZM-bl (8) | 11.5         | 2.1               | 7.7-14.4  |           |                                                          |                   |                   |                                       |               |                 |
| 10-1074         | Off         | 30 mg/kg | wk 0       | ELISA (4)    | 11.9              | 3.5       | 7.9-15.1  | 12,924.1                                                 | 2,507.2           | 10,009.6-16,136.0 | 1,249.0                               | 278.6         | 889.1-1,561.2   |
|                 |             |          |            | TZM-bl (4)   | 11.5              | 1.6       | 9.5-13.3  | 10,880.4                                                 | 2,459.1           | 9,260.1-14,514.9  | 2,359.4                               | 1,873.9       | 1,154.5-5,123.3 |
|                 | Off         | 30 mg/kg | wk 0-2-4   | ELISA (3)    | 12.7              | 1.5       | 11.7-14.4 | 44,769.0                                                 | 9,803.1           | 35,626.4-55,120.4 | 1,983.8                               | 336.2         | 1,618.9-2,281.0 |
|                 |             |          |            | TZM-bl (3)   | 11.5              | 0.5       | 11.0-12.1 | 31,505.9                                                 | 9,067.2           | 21,143.8-37,984.6 | 2,433.7                               | 1,092.7       | 1,205.6-3,298.1 |
|                 | All viremic | 30 mg/kg |            | ELISA (7)    | 12.2              | 2.7       | 7.9-15.1  |                                                          |                   |                   |                                       |               |                 |
|                 |             |          |            | TZM-bl (7)   | 11.5              | 1.2       | 9.5-13.3  |                                                          |                   |                   |                                       |               |                 |
|                 | On          | 10 mg/kg | wk0        | ELISA (4)    | 19.9              | 3.4       | 16.0-23.2 | 5,083.5                                                  | 1,513.2           | 3,153.8-6,485.4   | 350.2                                 | 107.7         | 217.4-474.9     |
| TZM-bl (4)      |             |          |            | 20.0         | 5.5               | 11.9-23.9 | 2,469.8   | 423.3                                                    | 1,934.7-2,916.2   | 227.2             | 45.6                                  | 179.4-281.1   |                 |
| On              | 30 mg/kg    | wk0      | ELISA (4)  | 18.1         | 2.3               | 15.4-20.5 | 16,519.6  | 5,125.0                                                  | 10,951.7-23,366.6 | 1,172.3           | 217.8                                 | 984.3-1,486.9 |                 |
|                 |             |          | TZM-bl (4) | 16.8         | 2.8               | 13.9-20.6 | 10,418.1  | 706.7                                                    | 9,751.7-11,377.6  | 1,231.3           | 655.9                                 | 713.3-2,189.6 |                 |
| All ART-treated |             |          | ELISA (8)  | 19.0         | 2.8               | 15.4-23.2 |           |                                                          |                   |                   |                                       |               |                 |
|                 |             |          | TZM-bl (8) | 18.4         | 4.4               | 11.9-23.9 |           |                                                          |                   |                   |                                       |               |                 |

\* Calculated terminal elimination half-lives.

\*\* One participant not included because of adjusted  $R^2 < 0.8$ .

AUC - Area under the curve, SD - standard deviation.

Table indicates pharmacokinetic parameters for the administered antibodies derived from serum concentrations determined by ELISA and TZM-bl assay. (a) Summary of results grouped by antibody and treatment status. (b) and (c) Results for 3BNC117 and 10-1074, respectively, obtained in individual study participants.

**Supplementary Table 5. Pharmacokinetics of 3BNC117 and 10-1074 (continued)**

**b 3BNC117**

| ID    | ART | Dose     | Regimen  | Method | C <sub>max</sub><br>(µg/ml) | Adjusted<br>R <sup>2</sup> | Estimated t <sub>1/2</sub><br>(days) | λ <sub>z</sub> lower<br>(days) | λ <sub>z</sub> upper<br>(days) | AUC<br>(INF_pred) | t <sub>last</sub><br>(days) | C <sub>last</sub><br>(µg/ml) | AUC_%<br>Extrap_pred |
|-------|-----|----------|----------|--------|-----------------------------|----------------------------|--------------------------------------|--------------------------------|--------------------------------|-------------------|-----------------------------|------------------------------|----------------------|
| 91C22 | Off | 30 mg/kg | wk 0     | ELISA  | 996.2                       | 0.999                      | 6.0                                  | 21                             | 42                             | 2,623.7           | 42                          | 1.3                          | 0.4                  |
|       |     |          |          |        | 1,443.4                     | 0.988                      | 6.3                                  | 14                             | 42                             | 3,196.2           | 42                          | 1.4                          | 0.4                  |
| 91C35 | Off | 30 mg/kg | wk 0     | ELISA  | 739.4                       | 0.998                      | 11.1                                 | 22                             | 58                             | 4,078.9           | 58                          | 2.6                          | 1.0                  |
|       |     |          |          |        | 1,440.5                     | 0.904                      | 12.5                                 | 7                              | 84                             | 6,660.3           | 84                          | 1.6                          | 0.3                  |
| 91C33 | Off | 30 mg/kg | wk 0     | ELISA  | 800.3                       | 1.000                      | 8.2                                  | 31                             | 56                             | 2,691.2           | 56                          | 2.1                          | 0.9                  |
|       |     |          |          |        | 1,307.4                     | 0.999                      | 6.3                                  | 21                             | 56                             | 4,109.7           | 56                          | 1.4                          | 0.3                  |
| 91C34 | Off | 30 mg/kg | wk 0     | ELISA  | 735.9                       | 0.996                      | 15.1                                 | 28                             | 87                             | 3,337.3           | 87                          | 1.6                          | 1.0                  |
|       |     |          |          |        | 945.1                       | 0.857                      | 6.7                                  | 28                             | 56                             | 6,226.7           | 56                          | 5.0                          | 1.0                  |
| 9341  | Off | 30 mg/kg | wk 0-2-4 | ELISA  | 778.4                       | 0.999                      | 8.1                                  | 43                             | 84                             | 5,345.9           | 84                          | 1.2                          | 0.3                  |
|       |     |          |          |        | 908.7                       | 0.864                      | 11.4                                 | 32                             | 140                            | 6,570.7           | 140                         | 0.5                          | 0.0                  |
| 9342  | Off | 30 mg/kg | wk 0-2-4 | ELISA  | 907.5                       | 0.933                      | 16.2                                 | 35                             | 112                            | 9,068.4           | 112                         | 4.9                          | 0.8                  |
|       |     |          |          |        | 1,604.3                     | 0.967                      | 7.8                                  | 42                             | 84                             | 14,677.4          | 84                          | 3.2                          | 0.3                  |
| 9343  | Off | 30 mg/kg | wk 0-2-4 | ELISA  | 898.0                       | 0.983                      | 12.8                                 | 42                             | 55                             | 8,362.9           | 55                          | 55.7                         | 12.0                 |
|       |     |          |          |        | 1,976.3                     | 0.779                      | 4.2                                  | 29                             | 55                             | 11,893.3          | 55                          | 23.5                         | 0.5                  |
| 1A12  | On  | 10 mg/kg | wk 0     | ELISA  | 306.4                       | 0.994                      | 18.3                                 | 42                             | 84                             | 1,220.1           | 84                          | 0.9                          | 1.9                  |
|       |     |          |          |        | 253.1                       | 0.992                      | 12.8                                 | 7                              | 56                             | 798.6             | 56                          | 1.2                          | 3.0                  |
| 1A27  | On  | 10 mg/kg | wk 0     | ELISA  | 197.3                       | 0.986                      | 10.2                                 | 7                              | 28                             | 657.6             | 28                          | 5.5                          | 11.9                 |
|       |     |          |          |        | 199.5                       | 0.973                      | 9.4                                  | 7                              | 28                             | 425.9             | 28                          | 2.8                          | 9.1                  |
| 1A29  | On  | 10 mg/kg | wk 0     | ELISA  | 228.1                       | 0.996                      | 17.4                                 | 21                             | 84                             | 1,056.6           | 84                          | 1.0                          | 2.3                  |
|       |     |          |          |        | 184.6                       | 1.000                      | 14.4                                 | 29                             | 57                             | 631.1             | 57                          | 1.2                          | 4.0                  |
| 1A71  | On  | 10 mg/kg | wk 0     | ELISA  | 169.7                       | 0.973                      | 19.8                                 | 14                             | 84                             | 920.6             | 84                          | 1.4                          | 3.9                  |
|       |     |          |          |        | 164.7                       | 0.937                      | 12.0                                 | 7                              | 43                             | 511.2             | 43                          | 1.9                          | 6.1                  |
| 1B05  | On  | 30 mg/kg | wk 0     | ELISA  | 1,298.7                     | 0.998                      | 16.7                                 | 56                             | 112                            | 4,682.2           | 112                         | 1.0                          | 0.5                  |
|       |     |          |          |        | 1,045.7                     | 0.995                      | 12.0                                 | 42                             | 84                             | 2,381.6           | 84                          | 1.0                          | 0.7                  |
| 1B44  | On  | 30 mg/kg | wk 0     | ELISA  | 1,062.4                     | 0.995                      | 9.4                                  | 15                             | 57                             | 2,844.0           | 57                          | 2.0                          | 0.9                  |
|       |     |          |          |        | 791.0                       | 0.999                      | 7.7                                  | 22                             | 43                             | 1,998.1           | 43                          | 1.9                          | 1.1                  |
| 1B55  | On  | 30 mg/kg | wk 0     | ELISA  | 1,316.7                     | 0.978                      | 13.5                                 | 14                             | 43                             | 5,208.4           | 43                          | 17.9                         | 6.3                  |
|       |     |          |          |        | 955.4                       | 0.957                      | 11.9                                 | 7                              | 56                             | 2,807.3           | 56                          | 3.2                          | 1.9                  |
| 1B61  | On  | 30 mg/kg | wk 0     | ELISA  | 987.1                       | 1.000                      | 10.4                                 | 42                             | 84                             | 3,549.8           | 84                          | 1.3                          | 0.5                  |
|       |     |          |          |        | 754.2                       | 0.952                      | 11.8                                 | 21                             | 56                             | 2,374.9           | 56                          | 3.0                          | 2.3                  |

**Supplementary Table 5. Pharmacokinetics of 3BNC117 and 10-1074 (continued)**

**c 10-1074**

| ID           | ART | Dose     | Regimen  | Method | C <sub>max</sub><br>(µg/ml) | Adjusted<br>R <sup>2</sup> | Estimated t <sub>1/2</sub><br>(days) | λ <sub>z</sub> lower<br>(days) | λ <sub>z</sub> upper<br>(days) | AUC<br>(INF_pred) | t <sub>last</sub><br>(days) | C <sub>last</sub><br>(µg/ml) | AUC_%<br>Extrap_pred |
|--------------|-----|----------|----------|--------|-----------------------------|----------------------------|--------------------------------------|--------------------------------|--------------------------------|-------------------|-----------------------------|------------------------------|----------------------|
| <b>91C22</b> | Off | 30 mg/kg | wk 0     | ELISA  | 1,561.2                     | 0.983                      | 9.8                                  | 14                             | 80                             | 10,029.1          | 80                          | 1.5                          | 0.2                  |
|              |     |          |          |        | 5,123.3                     | 0.996                      | 9.5                                  | 28                             | 80                             | 14,523.8          | 80                          | 0.7                          | 0.1                  |
| <b>91C35</b> | Off | 30 mg/kg | wk 0     | ELISA  | 1,224.3                     | 1.000                      | 15.1                                 | 42                             | 84                             | 12,900.2          | 84                          | 7.4                          | 1.3                  |
|              |     |          |          |        | 1,154.5                     | 0.991                      | 11.2                                 | 7                              | 84                             | 9,295.1           | 84                          | 2.6                          | 0.4                  |
| <b>91C33</b> | Off | 30 mg/kg | wk 0     | ELISA  | 1,321.4                     | 0.996                      | 14.6                                 | 21                             | 142                            | 12,824.0          | 142                         | 0.6                          | 0.1                  |
|              |     |          |          |        | 1,917.7                     | 1.000                      | 13.3                                 | 56                             | 111                            | 9,512.7           | 111                         | 0.6                          | 0.1                  |
| <b>91C34</b> | Off | 30 mg/kg | wk 0     | ELISA  | 889.1                       | 0.961                      | 7.9                                  | 87                             | 140                            | 16,141.1          | 140                         | 0.5                          | 0.0                  |
|              |     |          |          |        | 1,242.1                     | 0.996                      | 12.1                                 | 56                             | 112                            | 10,266.9          | 112                         | 1.2                          | 0.2                  |
| <b>9341</b>  | Off | 30 mg/kg | wk 0-2-4 | ELISA  | 1,618.9                     | 0.988                      | 12.1                                 | 43                             | 140                            | 35,646.9          | 140                         | 1.5                          | 0.1                  |
|              |     |          |          |        | 1,205.6                     | 0.990                      | 12.1                                 | 71                             | 140                            | 21,150.4          | 140                         | 0.4                          | 0.0                  |
| <b>9342</b>  | Off | 30 mg/kg | wk 0-2-4 | ELISA  | 2,281.0                     | 0.996                      | 14.4                                 | 84                             | 140                            | 55,298.8          | 140                         | 8.9                          | 0.3                  |
|              |     |          |          |        | 3,298.1                     | 0.991                      | 11.3                                 | 42                             | 140                            | 38,008.2          | 140                         | 1.6                          | 0.1                  |
| <b>9343</b>  | Off | 30 mg/kg | wk 0-2-4 | ELISA  | 2,051.4                     | 0.997                      | 11.7                                 | 30                             | 55                             | 48,842.1          | 55                          | 305.7                        | 10.8                 |
|              |     |          |          |        | 2,797.4                     | 0.817                      | 11.0                                 | 35                             | 55                             | 37,411.5          | 55                          | 151.3                        | 5.4                  |
| <b>1A12</b>  | On  | 10 mg/kg | wk 0     | ELISA  | 474.9                       | 0.990                      | 16.0                                 | 7                              | 84                             | 6,213.0           | 84                          | 6.9                          | 2.3                  |
|              |     |          |          |        | 281.1                       | 1.000                      | 11.9                                 | 42                             | 84                             | 2,941.4           | 84                          | 1.5                          | 0.9                  |
| <b>1A27</b>  | On  | 10 mg/kg | wk 0     | ELISA  | 217.4                       | 0.995                      | 18.2                                 | 20                             | 140                            | 3,166.0           | 140                         | 0.5                          | 0.4                  |
|              |     |          |          |        | 179.4                       | 1.000                      | 23.0                                 | 56                             | 112                            | 1,952.3           | 112                         | 0.5                          | 0.9                  |
| <b>1A29</b>  | On  | 10 mg/kg | wk 0     | ELISA  | 326.2                       | 1.000                      | 22.0                                 | 112                            | 161                            | 4,657.4           | 161                         | 1.0                          | 0.7                  |
|              |     |          |          |        | 246.9                       | 1.000                      | 23.9                                 | 112                            | 161                            | 2,682.7           | 161                         | 0.4                          | 0.5                  |
| <b>1A71</b>  | On  | 10 mg/kg | wk 0     | ELISA  | 382.4                       | 1.000                      | 23.2                                 | 111                            | 176                            | 6,507.3           | 176                         | 0.7                          | 0.3                  |
|              |     |          |          |        | 201.5                       | 1.000                      | 21.2                                 | 84                             | 140                            | 2,375.3           | 140                         | 0.5                          | 0.7                  |
| <b>1B05</b>  | On  | 30 mg/kg | wk 0     | ELISA  | 1,486.9                     | 0.998                      | 17.2                                 | 112                            | 175                            | 23,382.3          | 175                         | 0.6                          | 0.1                  |
|              |     |          |          |        | 952.1                       | 0.995                      | 13.9                                 | 21                             | 147                            | 11,382.8          | 147                         | 0.3                          | 0.0                  |
| <b>1B44</b>  | On  | 30 mg/kg | wk 0     | ELISA  | 1,107.9                     | 0.997                      | 15.4                                 | 57                             | 105                            | 10,996.5          | 105                         | 2.1                          | 0.4                  |
|              |     |          |          |        | 2,189.6                     | 0.979                      | 16.6                                 | 57                             | 105                            | 10,071.2          | 105                         | 0.6                          | 0.1                  |
| <b>1B55</b>  | On  | 30 mg/kg | wk 0     | ELISA  | 1,110.1                     | 0.999                      | 19.4                                 | 21                             | 168                            | 16,131.3          | 168                         | 1.2                          | 0.2                  |
|              |     |          |          |        | 1,070.4                     | 0.999                      | 16.2                                 | 29                             | 139                            | 10,502.1          | 139                         | 0.8                          | 0.2                  |
| <b>1B61</b>  | On  | 30 mg/kg | wk 0     | ELISA  | 984.3                       | 0.999                      | 20.5                                 | 112                            | 168                            | 15,734.5          | 168                         | 2.5                          | 0.5                  |
|              |     |          |          |        | 713.3                       | 0.986                      | 20.6                                 | 21                             | 168                            | 9,772.0           | 168                         | 0.9                          | 0.2                  |

**Supplementary Table 6. Antibody sensitivity of plasma SGA-derived pseudoviruses**

| Response                                                                               | ID                                                                        | Seq ID                                                          | Time point | 3BNC117 |       | 10-1074 |       | PGDM1400 |       | PGT121 |       | µg/ml |  |
|----------------------------------------------------------------------------------------|---------------------------------------------------------------------------|-----------------------------------------------------------------|------------|---------|-------|---------|-------|----------|-------|--------|-------|-------|--|
|                                                                                        |                                                                           |                                                                 |            | IC50    | IC80  | IC50    | IC80  | IC50     | IC80  | IC50   | IC80  |       |  |
|                                                                                        |                                                                           |                                                                 |            |         |       |         |       |          |       |        |       |       |  |
| 91C22                                                                                  | 91C22 A2<br>91C22 A5<br>91C22 A6<br>91C22 A10                             | Day 0                                                           | 0.003      | 0.013   | 0.003 | 0.008   | 0.089 | 0.572    | 0.002 | 0.007  |       |       |  |
|                                                                                        |                                                                           |                                                                 | 0.010      | 0.033   | 0.004 | 0.010   | 0.123 | 0.721    | 0.004 | 0.014  |       |       |  |
|                                                                                        |                                                                           |                                                                 | 0.002      | 0.006   | 0.003 | 0.008   | 0.104 | 0.638    | 0.002 | 0.007  |       |       |  |
|                                                                                        |                                                                           |                                                                 | 0.005      | 0.013   | 0.003 | 0.008   | 0.212 | 0.833    | 0.003 | 0.008  |       |       |  |
|                                                                                        | 91C22 A11<br>91C22 B1<br>91C22 B3<br>91C22 B4                             | Week 14                                                         | 0.006      | 0.016   | 0.050 | 0.179   | 0.070 | 0.324    | 0.027 | 0.103  |       |       |  |
|                                                                                        |                                                                           |                                                                 | 0.008      | 0.022   | 0.058 | 0.189   | 0.096 | 0.326    | 0.028 | 0.078  |       |       |  |
|                                                                                        |                                                                           |                                                                 | 0.006      | 0.018   | 0.003 | 0.008   | 0.159 | 1.055    | 0.003 | 0.016  |       |       |  |
|                                                                                        |                                                                           |                                                                 | 0.006      | 0.016   | 0.002 | 0.008   | 0.118 | 0.946    | 0.003 | 0.009  |       |       |  |
|                                                                                        | 91C22 B7                                                                  | Week 16                                                         | 0.005      | 0.014   | 0.003 | 0.007   | 0.155 | 0.933    | 0.004 | 0.013  |       |       |  |
|                                                                                        | 91C34                                                                     | 91C34 day 0_1<br>91C34 day 0_2<br>91C34 day0_4<br>91C34 day0_10 | Day 0      | 0.020   | 0.091 | 0.017   | 0.081 | > 50     | > 50  | 0.089  | 0.417 |       |  |
|                                                                                        |                                                                           |                                                                 |            | 0.009   | 0.029 | 0.025   | 0.084 | > 50     | > 50  | 0.070  | 0.321 |       |  |
|                                                                                        |                                                                           |                                                                 |            | 0.016   | 0.056 | 0.026   | 0.113 | > 50     | > 50  | 0.091  | 0.305 |       |  |
| 0.007                                                                                  |                                                                           |                                                                 |            | 0.029   | 0.006 | 0.027   | NT    | NT       | NT    | NT     |       |       |  |
| 91C34 W6_4<br>91C34 w6_6                                                               |                                                                           | Week 6                                                          | 0.009      | 0.031   | 0.062 | 0.403   | > 50  | > 50     | 0.137 | 0.923  |       |       |  |
|                                                                                        |                                                                           |                                                                 | 0.011      | 0.036   | 0.073 | 0.427   | > 50  | > 50     | 0.123 | 0.529  |       |       |  |
| 91C34 w12_1<br>91C34 w12_2<br>91C34 w12_4<br>91C34 w12_5<br>91C34 w12_7<br>91C34 w12_8 |                                                                           | Week 12                                                         | 0.014      | 0.047   | 0.094 | 0.640   | > 50  | > 50     | 1.210 | > 50   |       |       |  |
|                                                                                        |                                                                           |                                                                 | 0.035      | 0.113   | 0.075 | 0.323   | > 50  | > 50     | 0.045 | 0.151  |       |       |  |
|                                                                                        |                                                                           |                                                                 | 0.056      | 0.153   | > 50  | > 50    | > 50  | > 50     | > 50  | > 50   |       |       |  |
|                                                                                        |                                                                           |                                                                 | 0.060      | 0.170   | > 50  | > 50    | > 50  | > 50     | > 50  | > 50   |       |       |  |
|                                                                                        | 0.009                                                                     |                                                                 | 0.065      | 0.017   | 0.189 | NT      | NT    | NT       | NT    |        |       |       |  |
|                                                                                        | 0.008                                                                     |                                                                 | 0.026      | 0.021   | 0.074 | NT      | NT    | NT       | NT    |        |       |       |  |
| 9342                                                                                   | 9342 B1<br>9342 B2<br>9342 B3<br>9342 B5<br>9342 B6<br>9342 B7<br>9342 B8 | Day 0                                                           | 0.015      | 0.052   | 0.016 | 0.054   | 3.254 | 10.811   | 0.010 | 0.036  |       |       |  |
|                                                                                        |                                                                           |                                                                 | 0.013      | 0.039   | 0.030 | 0.084   | 6.452 | 18.102   | 0.022 | 0.083  |       |       |  |
|                                                                                        |                                                                           |                                                                 | 0.033      | 0.101   | 0.028 | 0.085   | 0.837 | 2.801    | 0.025 | 0.107  |       |       |  |
|                                                                                        |                                                                           |                                                                 | 0.052      | 0.181   | 0.019 | 0.055   | 0.981 | 5.296    | 0.009 | 0.030  |       |       |  |
|                                                                                        | 9342 A1<br>9342 A2<br>9342 A3<br>9342 A6<br>9342 A8                       | Week 20                                                         | 0.010      | 0.031   | 0.016 | 0.037   | 1.904 | 9.166    | 0.010 | 0.031  |       |       |  |
|                                                                                        |                                                                           |                                                                 | 0.027      | 0.099   | > 50  | > 50    | 1.173 | 5.389    | > 50  | > 50   |       |       |  |
|                                                                                        |                                                                           |                                                                 | 0.042      | 0.116   | 0.057 | 0.192   | 1.473 | 4.911    | 0.023 | 0.108  |       |       |  |
|                                                                                        |                                                                           |                                                                 | 0.062      | 0.216   | > 50  | > 50    | 3.942 | 16.337   | > 50  | > 50   |       |       |  |
| 9343                                                                                   | 9343 A1<br>9343 A3<br>9343 A5<br>9343 A6<br>9343 A8                       | Day 0                                                           | 0.016      | 0.045   | 0.014 | 0.038   | > 50  | > 50     | 0.010 | 0.035  |       |       |  |
|                                                                                        |                                                                           |                                                                 | 0.005      | 0.018   | 0.005 | 0.018   | > 50  | > 50     | 0.003 | 0.009  |       |       |  |
|                                                                                        |                                                                           |                                                                 | 0.013      | 0.031   | 0.013 | 0.031   | > 50  | > 50     | 0.005 | 0.017  |       |       |  |
|                                                                                        |                                                                           |                                                                 | 0.011      | 0.033   | 0.011 | 0.033   | > 50  | > 50     | 0.013 | 0.100  |       |       |  |
|                                                                                        | 9343 B6<br>9343 B9                                                        | Week 7                                                          | 0.030      | 0.218   | > 50  | > 50    | NT    | NT       | NT    | NT     |       |       |  |
|                                                                                        |                                                                           |                                                                 | 0.034      | 0.179   | > 50  | > 50    | > 50  | > 50     | > 50  | > 50   |       |       |  |
|                                                                                        | 9343 B1<br>9343 B2<br>9343 B4<br>9343 B5                                  | Week 8                                                          | 0.094      | 0.428   | > 50  | > 50    | > 50  | > 50     | > 50  | > 50   |       |       |  |
|                                                                                        |                                                                           |                                                                 | 0.053      | 0.178   | > 50  | > 50    | NT    | NT       | NT    | NT     |       |       |  |
|                                                                                        |                                                                           |                                                                 | 0.043      | 0.143   | > 50  | > 50    | NT    | NT       | NT    | NT     |       |       |  |
|                                                                                        |                                                                           |                                                                 | 0.049      | 0.188   | > 50  | > 50    | NT    | NT       | NT    | NT     |       |       |  |

NT: Not tested.

Table indicates sensitivity of pseudoviruses against 3BNC117, 10-1074, PGDM1400 and PGT121. Pseudoviruses were constructed using *env* sequences obtained by SGA on plasma samples of the indicated time points. Sensitivity was determined in the TZM-bl neutralization assay. Participants are grouped based on the response to the 3BNC117 and 10-1074 infusions. Seq ID refers to virus sequence ID shown in **Fig. 3** and **Supplementary Fig. 6**.

Supplementary Table 6. Antibody sensitivity of plasma SGA-derived pseudoviruses (continued)

|                     | ID       | Seq ID    | Time point | 3BNC117 |       | 10-1074 |       | PGDM1400 |        | PGT121 |       | µg/ml                                                          |
|---------------------|----------|-----------|------------|---------|-------|---------|-------|----------|--------|--------|-------|----------------------------------------------------------------|
|                     |          |           |            | IC50    | IC80  | IC50    | IC80  | IC50     | IC80   | IC50   | IC80  |                                                                |
| Short-term response | 91C35    | 91C35 A1  | Day 0      | 0.386   | 1.721 | <0.001  | 0.003 | 0.040    | 0.204  | <0.001 | 0.001 | < 0.01<br>0.01 - 0.1<br>0.1 - 0.5<br>0.5 - 5<br>5 - 50<br>> 50 |
|                     |          | 91C35 A2  |            | 0.304   | 1.490 | 0.001   | 0.003 | 0.048    | 0.626  | <0.001 | 0.002 |                                                                |
|                     |          | 91C35 A3  |            | 0.125   | 0.442 | 0.002   | 0.006 | 1.814    | > 50   | <0.001 | 0.005 |                                                                |
|                     |          | 91C35 A4  |            | 0.234   | 1.233 | <0.001  | 0.002 | 0.170    | 1.214  | <0.001 | 0.001 |                                                                |
|                     |          | 91C35 A5  |            | 0.255   | 0.861 | <0.001  | 0.004 | 0.044    | 0.208  | <0.001 | 0.003 |                                                                |
|                     |          | 91C35 A7  |            | 0.421   | 1.851 | 0.002   | 0.004 | 0.257    | 16.039 | 0.001  | 0.003 |                                                                |
|                     |          | 91C35 A10 |            | 0.073   | 0.235 | 0.002   | 0.008 | 1.484    | 38.424 | 0.001  | 0.006 |                                                                |
|                     |          | 91C35 A12 |            | 0.516   | 2.335 | 0.001   | 0.005 | 0.090    | 0.527  | <0.001 | 0.003 |                                                                |
|                     |          | 91C35 B1  |            | 0.348   | 1.436 | 0.002   | 0.007 | 0.028    | 0.092  | 0.001  | 0.004 |                                                                |
|                     |          | 91C35 B2  |            | 0.339   | 2.152 | > 50    | > 50  | 0.063    | 0.560  | 30.773 | > 50  |                                                                |
|                     | 91C35 B3 | 0.219     | 1.419      | > 50    | > 50  | 0.072   | 0.694 | > 50     | > 50   |        |       |                                                                |
|                     | 91C35 B5 | 0.295     | 1.918      | > 50    | > 50  | 0.057   | 0.438 | 2.507    | > 50   |        |       |                                                                |
|                     | 91C35 B6 | 41.958    | > 50       | > 50    | > 50  | 0.073   | 0.509 | 11.548   | > 50   |        |       |                                                                |
|                     | 9341     | 9341 A5   | Day 0      | 0.035   | 0.104 | 0.149   | 0.424 | 0.602    | 3.104  | 0.151  | 0.568 |                                                                |
|                     |          | 9341 A12  |            | 0.097   | 0.350 | 0.205   | 0.721 | 0.567    | 2.867  | 0.240  | 1.130 |                                                                |
|                     |          | 9341 B2A  |            | 0.057   | 0.160 | 0.156   | 0.710 | 0.417    | 2.121  | 0.344  | 1.643 |                                                                |
| 9341 B4             |          | 0.007     |            | 0.019   | 0.067 | 0.292   | 0.073 | 0.347    | 0.038  | 0.165  |       |                                                                |
| 9341 B5             |          | 0.040     |            | 0.113   | 0.132 | 0.475   | 0.519 | 2.482    | 0.109  | 0.505  |       |                                                                |
| 9341 B2             |          | Week 4    | 42.305     | > 50    | > 50  | > 50    | 0.173 | 0.888    | > 50   | > 50   |       |                                                                |
| 9341 B7             |          | Week 5    | 0.040      | 0.213   | > 50  | > 50    | NT    | NT       | NT     | NT     |       |                                                                |
| 9341 B6             | 0.046    |           | 0.358      | > 50    | > 50  | 0.216   | 1.636 | > 50     | > 50   |        |       |                                                                |
| 9341 B5             | 0.060    |           | 0.298      | > 50    | > 50  | 0.271   | 2.157 | > 50     | > 50   |        |       |                                                                |
| No response         | 91C33    | 91C33 A3  | Day 0      | 0.027   | 0.075 | 0.078   | 0.273 | 4.433    | 43.039 | 0.181  | 0.891 |                                                                |
|                     |          | 91C33 A4  |            | 0.023   | 0.110 | 0.053   | 0.203 | 40.565   | > 50   | 0.089  | 0.517 |                                                                |
|                     |          | 91C33 A5  |            | 0.029   | 0.082 | 0.077   | 0.219 | 4.210    | 46.952 | 0.193  | 0.939 |                                                                |
|                     |          | 91C33 A6  |            | > 50    | > 50  | > 50    | > 50  | > 50     | > 50   | > 50   | > 50  |                                                                |
|                     |          | 91C33 A9  |            | > 50    | > 50  | > 50    | > 50  | NT       | NT     | NT     | NT    |                                                                |
|                     |          |           |            |         |       |         |       |          |        |        |       |                                                                |

NT: Not tested.
